# Supplementary material for: Combined Molecular and Elemental Mass Spectrometry Approaches for Absolute Quantification of Proteomes: Application to the Venomics Characterization of the Two Species of Desert Black Cobras, Walterinnesia aegyptia and Walterinnesia morgani
Source: J Proteome Res. 2021 Oct 4;20(11):5064–78. doi: 10.1021/acs.jproteome.1c00608 (PMC8576837; doi:10.1021/acs.jproteome.1c00608)
Supplement: Supplementary file 1 — pr1c00608_si_001.xlsx [file pr1c00608_si_001.xlsx]

## Sheet: INDEX
			INDEX
			Table S1		Transcriptomics database
			Table S2		MS/MS identification of peptides/proteins in the RP-HPLC fractions of the venom of adult Walterinnesia aegyptia (Sinai Peninsula, Egypt)
			Table S3		MS/MS identification of peptides/proteins in the RP-HPLC fractions of the venom of adult Walterinnesia aegyptia (Riyadh, Saudi Arabia)
			Table S4		MS/MS identification of peptides/proteins in the RP-HPLC fractions of the venom of adult Walterinnesia morgani (Çörten village, Turkey)
			Table S5		Top-Down MS identifications of proteins in the proteomes of Walterinnesia aegyptia and W. morgani venoms
			Table S6		Quantification by QQQ ICP-MS of the venom proteome of W. aegyptia (Sinai Peninsula, Egypt))
			Table S7		Quantification by QQQ ICP-MS of the venom proteome of W. aegyptia (Riyadh, Saudi Arabia)
			Table S8		Quantification by QQQ ICP-MS of the venom proteome of W. morgani (Çörten village, Turkey)

## Sheet: Transcriptomic database
			Table S1. Venom gland transcriptomics-assisted top-down MS-derived full-length sequences for the venom proteome of a black desert cobra, Walterinnesia aegyptia, specimen of unknown origin kept in captivity in London Zoo.
			Data from Kazandjian, TD et al., "Convergent Evolution of Pain-Inducing Defensive Venom Components in Spitting Cobras", Science 371 (2021) 386-390, publicly available in the MassIVE repository under accession number
			MSV000081885, and in ProteomXchange (accession number PXD008597).
			Precursor mass [RED]	Feature intensity	% abundance	Closest homologue in database		Proteoform's amino acid sequence
			7104.16	1.46843e+08	0.0388808	3FTX_W.aegyptia_T1024_T3273_Complete 3FTX_W.aegyptia_T1024_T3273_Complete		FVCHNQQSSQPPT(TTNCSGGENKCYKKRWST)[234.02702]HRGTITERGCGCPTVKKGIELHCCTTDQCNL
			6856.11	24948797080	6.6059	pdb|1COD|A Chain A, Solution Conformation Of Cobrotoxin		LECHNQQSSQTPTTTGCSGGETNCYKKRWRDHRGYRTERGCGCPSVKNGIEI(NCCTTDRCNN)[-95.95210]
	INDEX		6872.1	7.84378e+08	0.207686	3FTX_W.aegyptia_T1024_T3273_Complete 3FTX_W.aegyptia_T1024_T3273_Complete		FVCHNQQSSQP(PTTTNCSGGENKCYKKRWSTHRGTITERGCGCPTVKKGIELHCCTTDQC)[1.98903]NL
	Table S1		6889.1	4.60542e+07	0.0121942	3FTX_W.aegyptia_T1024_T3273_Complete 3FTX_W.aegyptia_T1024_T3273_Complete		FVCHNQQSSQPPT(TTNCSGGENKCYKKRWSTHRGTITERGCGCPTVKKGIELHCCTTDQCNL)[18.97861]
	Table S2		6872.1	7.84378e+08	0.207686	sp|P60773.1|3S11_NAJPH RecName: Full=Short neurotoxin 1; Short=NTX I		(LECHNQQ)[4.00971]SSQAPTTKTCSGETNCYKKWWSDHRGTIIERGCGCPKVKPGVKLNCCRTDRCNN
	Table S3		6840.12	1530672153	0.405289	3FTX_W.aegyptia_T1024_T3273_Complete 3FTX_W.aegyptia_T1024_T3273_Complete		FVCHNQQSSQPPTTT(NCSGGENKCYKKRWSTHRGTITERGCGCPTVKKGIELHCCTTDQCNL)[-29.98802]
	Table S4		6792.17	9.84369e+07	0.026064	3FTX_W.aegyptia_T1024_T3273_Complete 3FTX_W.aegyptia_T1024_T3273_Complete		FVCHNQQSSQP(PTTTNCSGGENKCYKKRWST)[-77.91164]HRGTITERGCGCPTVKKGIELHCCTTDQCNL
	Table S5		6873.11	7.84378e+08	0.207686	pdb|1G6M|A Chain A, Nmr Solution Structure Of Cbt2		LECHNQQSSQTPTTTGCSGGENNCYKKEWRDNRGYRTERGCGCPSVKKGIGI(N)[16.10854]CCTTDRCNN
	Table S6		6856.11	24948797080	6.6059	AAB25735.1 neurotoxin, NTX [Naja naja=Formosan cobra, ssp. atra, venom, Peptide, 62 aa]		LECHNQQSSQTPTT(TGCSGGETNCYKKRWRDHRGYRTERGCGCPSVKN)[-95.94812]GIEINCCTTDRCNN
	Table S7		6838.1	1530672153	0.405289	AAB33649.1 toxin-3=postsynaptic neurotoxin short chain [Naja naja sputatrix venom]		LECHDQQSSQTPTTTGCSGGETNCYKKRWRDHRGYRTERGCGCPSV(KN)[-114.95783]GIEINCCTTDRCNN
	Table S8		6894.06	1302429394	0.344855	3FTX_W.aegyptia_T1024_T3273_Complete 3FTX_W.aegyptia_T1024_T3273_Complete		FVCHNQQSSQP(PTTTNCSGGENKCYKKRWST)[23.93812]HRGTITERGCGCPTVKKGIELHCCTTDQCNL
			6914.11	1.70921e+08	0.0452563	3FTX_W.aegyptia_T1024_T3273_Complete 3FTX_W.aegyptia_T1024_T3273_Complete		FVCHNQQSSQPPTT(TNCSGGENKCYKKRWST)[43.99544]HRGTITERGCGCPTVKKGIELHCCTTDQCNL
			6857.12	24948797080	6.6059	pdb|1G6M|A Chain A, Nmr Solution Structure Of Cbt2		LECHNQQSSQTPTTTGCSGGENNCYKKEWRDNRGYRTERGCGCPSVKKGIG(INCCTTDR)[0.10225]CNN
			7031.14	1.99139e+08	0.0527276	3FTX_W.aegyptia_T1024_T3273_Complete 3FTX_W.aegyptia_T1024_T3273_Complete		FVCHNQQSSQPPTTT(NCSGGENKCYKKRWST)[161.00268]HRGTITERGCGCPTVKKGIELHCCTTDQCNL
			6856.11	24948797080	6.6059	3FTX_W.aegyptia_T1024_T3273_Complete 3FTX_W.aegyptia_T1024_T3273_Complete		FVCHNQQSSQPPTTTNCSGGE(NKCYKKRWST)[-14.00939]HRGTITERGCGCPTVKKGIELHCCTTDQCNL
			6753.13	219002194	0.0579871	sp|P01423.1|3S12_NAJNI RecName: Full=Short neurotoxin 2; AltName: Full=Neurotoxin beta		MICHNQQSSQRPTIKTCPGETNCYKKRWRDHRGTIIERGCGCPSV(KKGVGIYCCKTDKCN)[-217.20420]R
			6801.1	2.94935e+08	0.0780924	3FTX_N.nivea_T0632_Complete 3FTX_N.nivea_T0632_Complete		FITPDVTSQACPDGHVCYTKMWCDNFCGMRGKRVDLGCAATCPKVKPGVDIKCCSRDNCNPF
			6786.09	10339498350	2.73768	3FTX_N.philippensis_T1247_T0775_T1071_Partial		LECHNQQSSQAPTTTCCPGGETNCYKKWWSGHCGTVIERGCGCPKVKPGVKLNCCRTDRCNN
			6776.08	8.27496e+07	0.0219103	AAD09180.1 cobrotoxin III, partial [Naja atra]		M(ECHNQQSSQT)[-56.93304]PTTTGCSGGETNCYKKWWSDHRGTIIERGCGCPKVKPGVNLNCCTTDRCNN
			6786.09	10339498350	2.73768	3FTX_W.aegyptia_T1024_T3273_Complete 3FTX_W.aegyptia_T1024_T3273_Complete		VCHNQQ(SSQPPTTTNCSGGENKCYKKRWSTHRGTITERGCGCPTVK)[63.04179]KGIELHCCTTDQCNL
			6785.1	10339498350	2.73768	Kunitz_N.haje_T2474_Partial Kunitz_N.haje_T2474_Partial		TPISGRPQFCELPAETGQCKAHIRSFHYNLAAQQCLEFIYGGCGGNANRFKTIDECHRTCV
			6785.1	10339498350	2.73768	3FTX_N.nivea_T0879_Complete 3FTX_N.nivea_T0879_Complete		KCGVSGCHLKITCSAEETFCYKWHNKILNLRWHGCAKTCTEEDTWKAYIKCCTTNLCNT
			6825.04	6.29383e+08	0.166647	AAD09179.1 cobrotoxin IV, partial [Naja atra]		MECHNQQSSQAPTTKTCSGETNCYKKWWSDHRGTIIERGCGCPKVKPGVNLNCCT(TDR)[7.99825]CNN
			6654	1.76618e+08	0.0467646	sp|P01415.1|3SO62_NAJHH RecName: Full=Weak toxin CM-2		(FTCFT)[-374.03649]TPSDTSETCPDGQNICYEKRWNSHQGVEIKGCVASCPEFESRFRYLLCCRIDNCNK
			6824.04	6.29383e+08	0.166647	ADN67573.1 three-finger toxin precursor [Naja atra]		CSTRYCTTFHTCPNGQDLCFKRWYEGNQLGWRAIRGCAATCPEAKTRETVECCATDKCNK
			6769.07	291384792	0.0771524	3FTX_N.philippensis_T1247_T0775_T1071		CHNQ(Q)[226.17203]SSQAPTTTCCPGGETNCYKKWWSGHCGTVIERGCGCPKVKPGVKLNCCRTDRCNN
			6785.1	10339498350	2.73768	pdb|1ONJ|A Chain A, Crystal Structure Of Atratoxin-b From Chinese Cobra Venom Of Naja Atra		(LE)[-43.94022]CHNQQSSQTPTTKTCSGETNCYKKWWSDHRGTIIERGCGCPKVKPGVNLNCCTTDRCNN
			5529.52	6.89947e+08	0.182683	Kunitz_W.aegyptia_T1936_Partial Kunitz_W.aegyptia_T1936_Partial		PGPCSNYRPAYYYNPASRKCEEFMYGGCKGNKNNFKTRHECHRVCVR
			6785.11	10339498350	2.73768	3FTX_N.atra_T0325_Complete 3FTX_N.atra_T0325_Complete		SRTPETTEICPDSWYFCYKISLADGNDVRIKRGCTFTCPELRPTGKYVYCCRRDKCNQ
			6785.11	10339498350	2.73768	3FTX_N.siamensis_T1064_Complete 3FTX_N.siamensis_T1064_Complete		(LECHNQQ)[-54.05624]SSQPPTTKTCPGETNCYKKRWRDHRGSITERGCGCPSVKKGIEINCCTTDKCNN
			6636.07	6.48886e+07	0.0171811	Kunitz_W.aegyptia_T1936_Partial Kunitz_W.aegyptia_T1936_Partial		GGPKYCHLPADPG(PCSNYRPAYY)[-31.95775]YNPASRKCEEFMYGGCKGNKNNFKTRHECHRVCVR
			6636.07	6.48886e+07	0.0171811	Kunitz_N.annulifera_T0981_T0974_Partial Kunitz_N.annulifera_T0981_T0974_Partial		GGPKYCHLPADPG(PCSNYQYVYYYNPALRKCEQFIYGGCE)[-106.02343]GNKNNFKTRHECHRVCVR
			6668.04	5745859057	1.52138	Kunitz_W.aegyptia_T1936_Partial Kunitz_W.aegyptia_T1936_Partial		GGPKYCHLPADPGPCSNYRPAYYYNPASRKCEEFMYGGCKGNKNNFKTRHECHRVCVR
			6611.02	5.80271e+07	0.0153643	Kunitz_W.aegyptia_T1936_Partial Kunitz_W.aegyptia_T1936_Partial		GPKYCHLPADPGPCSNYRPAYYYNPASRKCEEFMYGGCKGNKNNFKTRHECHRVCVR
			6705.98	2.20871e+08	0.0584819	Kunitz_W.aegyptia_T1936_Partial Kunitz_W.aegyptia_T1936_Partial		GGPKYCHLPADPG(PCSNYRPAYYYNPASRKCEEFMY)[37.95514]GGCKGNKNNFKTRHECHRVCVR
			6786.1	6.88602e+08	0.182327	sp|P01424.1|3S11_NAJME RecName: Full=Short neurotoxin 1; AltName: Full=Neurotoxin D		MECHNQQSSQPPTTKTCPGETNCYKKQWSDHRGTIIERGCGCPSVKKGVKINCCT(TDRC)[-12.94018]NN
			6781.13	331025152	0.0876483	Kunitz_W.aegyptia_T1936_Partial Kunitz_W.aegyptia_T1936_Partial		LGGPKYCHLPADPGPCSNYRPAYYYNPASRKCEEFMYGGCKGNKNNFKTRHECHRVCVR
			6785.11	6.88602e+08	0.182327	pdb|1G6M|A Chain A, Nmr Solution Structure Of Cbt2		LECHNQQSSQTPTTTGCSGGENNCYKKEWRDNRGYRTERGCGCPSVKKG(IG)[-71.94520]INCCTTDRCNN
			6785.11	6.88602e+08	0.182327	Kunitz_W.aegyptia_T1936_Partial Kunitz_W.aegyptia_T1936_Partial		LGGPKYCHLPA(D)[4.02032]PGPCSNYRPAYYYNPASRKCEEFMYGGCKGNKNNFKTRHECHRVCVR
			6842.06	6.89383e+07	0.0182534	Kunitz_W.aegyptia_T1936_Partial Kunitz_W.aegyptia_T1936_Partial		(PISGL)[-293.25710]GGPKYCHLPADPGPCSNYRPAYYYNPASRKCEEFMYGGCKGNKNNFKTRHECHRVCVR
			6787	1.6978e+07	0.00449542	3FTX_N.siamensis_T2648_T0116_Partial 3FTX_N.siamensis_T2648_T0116_Partial		CVKEKFLFSETTETC(PDGQNVCFNQAHLIYPGKYKRTRGCAATCPKLQ)[-357.31816]NRDVIFCLSTDKCNL
			6786.98	1.6978e+07	0.00449542	Kunitz_W.aegyptia_T1936_Partial Kunitz_W.aegyptia_T1936_Partial		(LGGPKYCHL)[6.06129]PADPGPCSNYRPAYYYNPASRKCEEFMYGGCKGNKNNFKTRHECHRVCVR
			6786.13	6.88602e+08	0.182327	3FTX_N.atra_T0611_Complete 3FTX_N.atra_T0611_Complete		TLECHNQQSSQAPTTKTCSGETNCYKKWWSDHRGTIIERGCGCPKVKPGVNLNCCTTDRCN
			6785.11	6.88602e+08	0.182327	AAD09180.1 cobrotoxin III, partial [Naja atra]		MECHNQQSSQTPTTTG(CSGGETNCYKKWWSDHRGT)[-47.92784]IIERGCGCPKVKPGVNLNCCTTDRCNN
			4974.15	5.612e+08	0.148594	Kunitz_N.melanoleuca.VG_T0517_Complete Kunitz_N.melanoleuca.VG_T0517_Complete		L.CKAHIPSFHYNLAAQQCLGFIYGGCG(GNANR)[174.99966]FKTIDECHRTCVG
			5012.09	3.44136e+07	0.00911197	Kunitz_N.melanoleuca.VG_T0517_Complete Kunitz_N.melanoleuca.VG_T0517_Complete		CKAHIPSFHYNLAAQQCLGFIYGGCG(GNANRF)[212.94599]KTIDECHRTCVG
			4687.06	1.08982e+06	0.000288562	Kunitz_N.mossambica.VG_T2744_Partial Kunitz_N.mossambica.VG_T2744_Partial		GLCKAH(IPSFHYNLAAQQCLGFIYGGCGGNANRF)[-282.26319]KTIDECHRTCVG
			4974.14	5.612e+08	0.148594	Kunitz_N.nigricollis.TZA_T0977_Partial Kunitz_N.nigricollis.TZA_T0977_Partial		KAHIPSFHYNLAAQQCL(GFIYGGCGGNANR)[278.05045]FKTIDECHRTCVG
			4974.14	5.612e+08	0.148594	Kunitz_N.mossambica.VG_T2744_Partial Kunitz_N.mossambica.VG_T2744_Partial		CKAHIPSFHYNLAAQQCLGFIYGGCG(GNANRF)[174.99571]KTIDECHRTCVG
			6116.89	2.27096e+07	0.00601301	Kunitz_W.aegyptia_T1653_T1604_Complete Kunitz_W.aegyptia_T1653_T1604_Complete		RPGLCELPAETGPCKARIRAFYYNPHSHKCLEFTYGGCKGNANNFKTID(ECNRTCVG)[-232.08497]
			6285.03	2.333e+07	0.00617729	Kunitz_W.aegyptia_T1653_T1604_Complete Kunitz_W.aegyptia_T1653_T1604_Complete		RPGLCELP(AETGPCKARIRAFYYNPHSHKCLEFTYGGCKGNANNFK)[-63.93677]TIDECNRTCVG
			6365.98	1.58803e+07	0.00420475	Kunitz_W.aegyptia_T1653_T1604_Complete Kunitz_W.aegyptia_T1653_T1604_Complete		RPGLCELP(AETGPCKARIRAFYYNPHSHKCLEFT)[17.00048]YGGCKGNANNFKTIDECNRTCVG
			6581.03	1.60151e+07	0.00424046	Kunitz_W.aegyptia_T1653_T1604_Complete Kunitz_W.aegyptia_T1653_T1604_Complete		RPGLCELPAETGPCKARIRAFYYNPHSHKCLEFTYGGCKGNANNFKTIDE(CNRTCVG)[232.05315]
			6318.01	8.63614e+07	0.0228666	Kunitz_W.aegyptia_T1653_T1604_Complete Kunitz_W.aegyptia_T1653_T1604_Complete		RPGLCELPAET(GPCKARIRAFYYN)[-30.96533]PHSHKCLEFTYGGCKGNANNFKTIDECNRTCVG
			6386.91	2.95857e+08	0.0783366	Kunitz_W.aegyptia_T1653_T1604_Complete Kunitz_W.aegyptia_T1653_T1604_Complete		RPGLCELPAETGPCKARIRAFYYNPHSHKCLEFTY(GGCKGNANNFK)[37.95386]TIDECNRTCVG
			6348.97	5780091366	1.53044	Kunitz_W.aegyptia_T1653_T1604_Complete Kunitz_W.aegyptia_T1653_T1604_Complete		RPGLCELPAETGPCKARIRAFYYNPHSHKCLEFTYGGCKGNANNFKTIDECNRTCVG
			6095.82	3.11036e+08	0.0823557	Kunitz_W.aegyptia_T1653_T1604_Complete Kunitz_W.aegyptia_T1653_T1604_Complete		GLCELPAETGPCKARIRAFYYNPHSHKCLEFTYGGCKGNANNFKTIDECNRTCVG
			5925.71	1.31052e+07	0.00346997	Kunitz_W.aegyptia_T1653_T1604_Complete Kunitz_W.aegyptia_T1653_T1604_Complete		CELPAETGPCKARIRAFYYNPHSHKCLEFTYGGCKGNANNFKTIDECNRTCVG
			6522.99	6.27606e+07	0.0166177	Kunitz_W.aegyptia_T1653_T1604_Complete Kunitz_W.aegyptia_T1653_T1604_Complete		(TPVSG)[-267.20414]RPGLCELPAETGPCKARIRAFYYNPHSHKCLEFTYGGCKGNANNFKTIDECNRTCVG
			7404.52	16070789380	4.2552	3FTX_N.naja_T2679_Partial 3FTX_N.naja_T2679_Partial		LTCLICPEKYCNKVHTCLNGEKICFKKYDQRKL(LGKRYIRGCADTCPVRKPREIVECCSTDKCNH)[-158.17235]
			7372.55	2.32584e+08	0.0615832	sp|P25679.2|3NO29_NAJKA RecName: Full=Weak toxin CM-9a		LTCLNCPEMFCGKFQICRNGEKICFKKLHQRRPLSRYIRGCADTCP(VGYPKEMIECCSTDKCNR)[-59.95783]
			7373.55	2.32584e+08	0.0615832	AAB19289.1 miscellaneous type neurotoxin [Naja naja=cobra, ssp. naja, Peptide, 65 aa]		LTCLICPEKYCNKVHTCLNGE(KICFKRYSERKLLGKRYIRGCAD)[-189.17631]TCPVRKPREIVQCCSTDKCNH
			7404.5	16070789380	4.2552	3FTX_N.melanoleuca.VG_T4313_T6039 _Complete		LTCLNCPEVYCRKFHTCRNGENICFKRFDQRKLLGKRYTRGCAATCPEAKPRETVECCSTDKCN
			7405.53	16070789380	4.2552	sp|P29181.1|3NO27_NAJNA RecName: Full=Weak neurotoxin 7		LTCLNCPEVYCRRFQICRDGEKICFKKFDQRNLL(GKRYRRGCAATCPEAKPREIVQCCSTDKCN)[-226.18502]R
			4409.91	2296494528	0.608062	Kunitz_N.mossambica.VG_T2744_Partial Kunitz_N.mossambica.VG_T2744_Partial		SFHYNLAAQQCLGFIYGGCG(GNANRFK)[260.07953]TIDECHRTCVG
			6395.88	14250493450	3.77322	sp|P00986.1|VKT2_NAJNI RecName: Full=Venom basic protease inhibitor 2		(RPRFCELPAETGLCKARIRSFHYNRAAQQCLEFIYGGCGGNANR)[-66.20325]FKTIDECHRTCVG
			5555.44	142505467	0.0377324	3FTX_W.aegyptia_T2393_Complete 3FTX_W.aegyptia_T2393_Complete		DCPDGQNLCFKRWHMMVPGRYDIIRGCAATCPKPE(NHDP)[-124.05356]IECCSTDKCNL
			7405.51	16070789380	4.2552	sp|P01400.1|3NO2B_NAJME RecName: Full=Weak toxin S4C11		LTCLICPEKYCNKVHTCRNGENICFKRFYEGNL(LGKRYPRGCAATCPEAKPREIVECCSTD)[-18.94994]KCNH
			7405.51	16070789380	4.2552	sp|P29180.1|3NO26_NAJNA RecName: Full=Weak neurotoxin 6		LTCLICPEKYCNKVHTCLNGEKICFKRYS(ERKLLGKRYIRGCADTCPV)[-157.22092]RKPREIVQCCSTDKCNH
			6569.91	9.50175e+07	0.0251586	Kunitz_N.melanoleuca.VG_T0517_Complete Kunitz_N.melanoleuca.VG_T0517_Complete		GRPWFCELPAET(GLCKAHIPSFHYNLAAQQCLGFIYGGCGGNANRF)[214.14125]KTIDECHRTCVG
			5799.54	1.26268e+07	0.0033433	Kunitz_N.melanoleuca.VG_T0517_Complete Kunitz_N.melanoleuca.VG_T0517_Complete		PWFCELPAE(TGLCKAHIPSFHYNLAAQQCLGFIYG)[-343.17021]GCGGNANRFKTIDECHRTCVG
			6569.9	9.50175e+07	0.0251586	sp|P00986.1|VKT2_NAJNI RecName: Full=Venom basic protease inhibitor 2		(RPRFCELPAETGLCKARIRSFHYNRAAQQCLEFIYGGCGGNANRF)[107.89749]KTIDECHRTCVG
			6489.15	1.86041e+07	0.00492597	sp|P29179.1|3NO25_NAJNA RecName: Full=Weak neurotoxin 5		LTCLI(CPEKY)[-449.16928]CNKVHTCLNGENICFKRFNRILGKRYDLGCAATCPTVKTGIVQCCSTDKCNH
			7405.53	16070789380	4.2552	sp|P29179.1|3NO25_NAJNA RecName: Full=Weak neurotoxin 5		LTC(LICPEKYCNKVHTCLNGENICFK)[467.21940]RFNRILGKRYDLGCAATCPTVKTGIVQCCSTDKCNH
			7378.16	9.56291e+07	0.0253205	3FTX_N.melanoleuca.VG_T4455 _Partial		MECYKCGVSGCHLKITCSAE(ETFCYKWHNKILNLRWHGCAKTCTEEDSWKAYIKCCTTNL)[80.92279]CNT
			7324.18	5.37095e+07	0.0142211	sp|P34076.1|3S11_NAJCH RecName: Full=Short neurotoxin 1		MECHNQQSSQP(PTTTHCSGGETNCYEKRWHDHRGTIIERGCGCPTVKPGVKLNCCTTDKCN)[435.22438]N
			6823.39	6.45133e+07	0.0170817	3FTX_N.mossambica.VG_T1107_Complete 3FTX_N.mossambica.VG_T1107_Complete		LKCNQLIPPFWKTCPKGKNLCYKMTMRAAPMVPVKRGCIDVCPKSSLLIKYMCCNTDKCN
			6822.38	6.45133e+07	0.0170817	pdb|1CXN|A Chain A		LKCNQLIPPFWKTCPKGKNLCYKMTMRAAPMVPVKRGCIDVCPKSSLLIKYMCCNTDKCN
			7340.23	1593342204	0.421883	3FTX_N.melanoleuca.VG_T4455 _Partial		MECYKCGVSGCHLKITCSAEETFCYKWHNK(ILNLRWHGCAKTCTEEDSWKAYIK)[42.97105]CCTTNLCNT
			7340.24	1593342204	0.421883	3FTX_N.nivea_T0879_Complete 3FTX_N.nivea_T0879_Complete		MECYKCGVSGCHLKITCSAE(ETFCYKWHNKILNLRWHGCAKTCTEEDTWKAYIK)[28.96447]CCTTNLCNT
			6610.96	4695069015	1.24315	ADN67586.1 three-finger toxin precursor, partial [Naja atra]		KCNQLIPPFYKTCAAGKNLCY(KMFMVAAPKVPVKRGCIDVCPKSSLLVKYVCCNTD)[39.69598]RCN
			7370.36	6.13176e+07	0.0162356	3FTX_N.nigricollis.Nigeria_T1493_Partial 3FTX_N.nigricollis.Nigeria_T1493_Partial		LTCVKYYTIFGVTPVDC(PDGQNLCFKRWHMMAPGRYDITRGCAATCPKAENHDSIK)[83.02069]CCSTDKCNL
			7372.35	6.13176e+07	0.0162356	3FTX_W.aegyptia_T2393_Complete 3FTX_W.aegyptia_T2393_Complete		LTCVKYYTIFGVTPVDC(PDGQNLCFKRWHMMVPGRYDIIRGCAATCPKPENHDPI)[7.98093]ECCSTDKCNL
			7394.31	132640063	0.0351202	3FTX_N.nubiae_T1547_Partial 3FTX_N.nubiae_T1547_Partial		LTCVKYYTIFGVTPV(DCPDGQNLCFKRWHMMAPGRYDITRGCAATCPKAENHDFIKCCSTD)[46.94860]KCNL
			7337.35	2.44265e+08	0.0646762	3FTX_N.pallida_T0906_Partial 3FTX_N.pallida_T0906_Partial		LTCVKYYTIFGVTPVDCPDGQNL(CFKRWHMMAPGRYDITRGCAATCPKAENHD)[49.06075]SIECCSTDKCNL
			7355.34	2607873980	0.690509	3FTX_N.pallida_T0906_Partial 3FTX_N.pallida_T0906_Partial		LTCVKYYTIFGVTPVDCPD(GQN)[67.07381]LCFKRWHMMAPGRYDITRGCAATCPKAENHDSIECCSTDKCNL
			7337.36	2.44265e+08	0.0646762	3FTX_N.nivea_T0896_Partial 3FTX_N.nivea_T0896_Partial		LTCVKYYTIFGVTPVDCPDGQN(LCFKRWHMMAPGRYDITRGCAATCPKAQN)[50.05257]HDSIECCSTDKCNL
			7338.34	2.44265e+08	0.0646762	3FTX_N.nubiae_T1547_Partial 3FTX_N.nubiae_T1547_Partial		LTCVKYYTIFGVTPVDCPDGQNLCFKRWHMMAP(GRYDITRGCAATCPK)[-9.02741]AENHDFIKCCSTDKCNL
			7338.34	2.44265e+08	0.0646762	3FTX_W.aegyptia_T2393_Complete 3FTX_W.aegyptia_T2393_Complete		LTCVKYYTIFGVTPVDCPDGQNLCFKRWHMMV(PGRYDIIRGCAATCPKPENHDPIE)[-26.04247]CCSTDKCNL
			7394.29	132640063	0.0351202	3FTX_N.nivea_T0896_Partial 3FTX_N.nivea_T0896_Partial		LTCVKYYTIFGVTPVDCPD(GQNLCFKRWHMMAPGRYDITRGCAATCPKAQN)[107.00342]HDSIECCSTDKCNL
			7393.3	132640063	0.0351202	3FTX_W.aegyptia_T2393_Complete 3FTX_W.aegyptia_T2393_Complete		LTCVKYYTIFGVTPVDCPDGQNLCFKRWHMMVPGRYDIIRGCAATCPKPE(NHDP)[28.91138]IECCSTDKCNL
			7355.34	2607873980	0.690509	3FTX_W.aegyptia_T2393_Complete 3FTX_W.aegyptia_T2393_Complete		LTCVKYYTIFGVTPVDCPDGQNLCFKRWHMMVPGRYDIIRGCAATCPKPENHD(PI)[-9.03525]ECCSTDKCNL
			7386.54	2.55895e+08	0.0677555	3FTX_N.annulifera_T0532_Complete 3FTX_N.annulifera_T0532_Complete		TRLCLSDYSIFSETI(EICPDGHNFCFKKFPKGI)[-99.02225]TRLPWVIRGCAATCPKAEAQVYVDCCARDKCNR
			7387.55	2.55895e+08	0.0677555	3FTX_N.kaouthia_T2210_Partial 3FTX_N.kaouthia_T2210_Partial		YTRLCLSDYSIFSETIEICPDGHNFCFKKFPKGIT(RLPWVIRGCAATCPKAE)[-289.14653]ARVYVDCCARDKCNR
			7355.35	2607873980	0.690509	3FTX_N.nivea_T0896_Partial 3FTX_N.nivea_T0896_Partial		LTCVKYYTIFGVTPVDCPD(GQNLCFKRWHMMAPGRYDITRGCAATCPKAQN)[68.04922]HDSIECCSTDKCNL
			7386.54	2.55895e+08	0.0677555	3FTX_N.nigricollis.Nigeria_T0126_Partial 3FTX_N.nigricollis.Nigeria_T0126_Partial		TRLCLSDY(SIFSET)[-84.83550]IEICPDGHNFCFKKFPKGITRLPWVVRGCAATCPKAEAQVYVDCCARDKCNR
			13216.9	2.68101e+06	0.000709873	sp|P00602.1|PA2A1_NAJMO RecName: Full=Acidic phospholipase A2 CM-I		(NLYQFKNMIHCTVPSRPWWHFADYGCYC)[7.30672]GRGGKGTAVDDLDRCCQVHDNCYGEAEKLGCWPYLTLYKYECSQGKLTCSGGNNKCEAAVCNCDLVAANCFAGAPYIDANYNVNLKERCQ
			7398.58	7.50553e+07	0.019873	3FTX_N.annulifera_T0532_Complete 3FTX_N.annulifera_T0532_Complete		RLCL(SDYS)[14.01638]IFSETIEICPDGHNFCFKKFPKGITRLPWVIRGCAATCPKAEAQVYVDCCARDKCNR
			13219.9	8.10369e+07	0.0214568	PLA2_N.nigricollis.tanzania_T1513_T1451_T1456_T1459_Partial PLA2		L.YQFKNMIHCTVPSRPWWHFADYGCYCGRG(GTGTAVDDLDRCCQVHDNCY)[265.22617]GEAEKLGCWPYLTLYKYECSQGKLTCSGGNNKCQAAVCNCDLVAANCFAGAPYIDANYNVNLKERCQ
			13221.9	8.10369e+07	0.0214568	sp|P00602.1|PA2A1_NAJMO RecName: Full=Acidic phospholipase A2 CM-I		NLYQFKNMIH(CTVPSRPWWHFA)[12.09493]DYGCYCGRGGKGTAVDDLDRCCQVHDNCYGEAEKLGCWPYLTLYKYECSQGKLTCSGGNNKCEAAVCNCDLVAANCFAGAPYIDANYNVNLKERCQ
			13360.6	8.92694e+07	0.0236366	PLA2_Walterinnesia.aegyptia_T3262_T3267		HLGQFNNMI(KCTI)[14.40114]PGSTPWWDFSDYGCYCGYGGSGTPVDQLDRCCQTHDNCYTEAQKFSGCSPYTRKYSYECSEGTLTCKSDNDECAAFVCNCDRSAAICFARAPYNSNNVDIDLEAHCQ
			13363.6	2.63951e+08	0.0698884	PLA2_Walterinnesia.aegyptia_T3262_T3268		HLGQFNNMIKCTIPGS(TPWWDFSDYGCYCGY)[17.37206]GGSGTPVDQLDRCCQTHDNCYTEAQKFSGCSPYTRKYSYECSEGTLTCKSDNDECAAFVCNCDRSAAICFARAPYNSNNVDIDLEAHCQ
			13325.6	8.83648e+06	0.00233971	PLA2_Walterinnesia.aegyptia_T3262_T3269		HLGQFNNMIKCTIPGSTPW(WDFSDYGCYCGYGGSGTPVDQLDRCCQTHDNCYTEAQKFSGCSPYTRKYSYECSEGTLTCKSDNDECAAFVCNCDRSAAICFARAPYNSNN)[-20.61733]VDIDLEAHCQ
			13560.6	4.07841e+07	0.0107988	PLA2_Walterinnesia.aegyptia_T3262_T3270		HLGQFNNMIKCTI(PGSTPWWDFSDYGCYCGYGGSGTPVDQLDRCCQTHDNCYTEAQKFSGCSPYTRKYSYECSEGTLTCKSDNDECAAFVCNCDRSAAICFARAPYNSNNVD)[214.10138]IDLEAHCQ
			13354.6	7.69771e+06	0.00203819	PLA2_Walterinnesia.aegyptia_T3262_T3271		HLGQFNNMIKCTIPGST(PWWDFSDYGCYCGYGGSGTPVDQLDRCCQTHDNCYTEAQKFSGCSPYTRKYSYECSEGTLTCKSDNDECAAFVCNCDRSAAICFARAPYNSNNVDID)[8.39492]LEAHCQ
			13329.6	3.05711e+08	0.0809456	PLA2_Walterinnesia.aegyptia_T3262_T3272		HLGQFNNMIKCTIPGSTPWWDFSDYGCYCGYGGSGT(PVDQL)[-17.00276]DRCCQTHDNCYTEAQKFSGCSPYTRKYSYECSEGTLTCKSDNDECAAFVCNCDRSAAICFARAPYNSNNVDIDLEAHCQ
			13347.6	32784490090	8.68063	PLA2_Walterinnesia.aegyptia_T3262_T3273		HLGQFNNMIKCTIPGSTPWWDFSDYGCYCGYGGSGTPVDQLDRCCQTHDNCYTEAQKFSGCSPYTRKYSYECSEGTLTCKSDNDECAAFVCNCDRSAAICFARAPYNSNNVDIDLEAHCQ
			13384.5	4.85161e+08	0.12846	PLA2_Walterinnesia.aegyptia_T3262_T3274		HLGQFNNMIKCTIPGSTPWWDFSDYGCYCGYGGSGTPVDQLDRCCQTHDNCYTEAQKFSGCSPYTRKYSYECSEGTLTCKSDNDECAAFVCNCDRSAAICFARAPYNSNNVD(ID)[37.95080]LEAHCQ
			13330.6	3.41484e+08	0.0904175	PLA2_Walterinnesia.aegyptia_T3262_T3275		HLGQFNNMIKCTIPGSTPWWDFSDYGC(YCGYGGSGT)[-15.78577]PVDQLDRCCQTHDNCYTEAQKFSGCSPYTRKYSYECSEGTLTCKSDNDECAAFVCNCDRSAAICFARAPYNSNNVDIDLEAHCQ
			13327.6	1.8477e+08	0.0489232	PLA2_Walterinnesia.aegyptia_T3262_T3276		HLGQFNNMIKCTIPGSTPWWDFSDYGCYCGYGGSGTPVDQLDRCCQTHDNCYTEAQKF(SGCSPYTRKYSYECSEGTLTCKSDNDECAAFVCNCD)[-18.92595]RSAAICFARAPYNSNNVDIDLEAHCQ
			13096.4	6.14567e+07	0.0162724	PLA2_Walterinnesia.aegyptia_T3262_T3277		GQFNNMIKCTIPGSTPWWDFSDYGCYCGYGGSGTPVDQLDRCCQTHDNCYTEAQKFSGCSPYTRKYSYECSEGTLTCKSDNDECAAFVCNCDRSAAICFARAPYNSNNVDIDLEAHCQ
			13386.6	5.83138e+08	0.154402	PLA2_Walterinnesia.aegyptia_T3262_T3278		HLGQFNNMIKCTIPGSTPWWDFSDYGCYCGYGG(SGTPVDQLDRCCQTHDNCYTEAQKFSGCSPYTRKYSYECSEGTLTCKSDNDEC)[40.05578]AAFVCNCDRSAAICFARAPYNSNNVDIDLEAHCQ
			13388.6	5.83138e+08	0.154402	pdb|1PSH|A Chain A		NLYQFKNMIKCTVPSRSWWDFADYGCYCGRGGSGTPVDDLDRCCQVHDNCYNEAEKISGCWPYFKTYSYECSQGTLTCKGDNNACAASVCDCDRLAAICFAGAPYNDNN(YNIDLK)[51.98087]ARCQ
			13370.6	2.40195e+08	0.0635985	PLA2_Walterinnesia.aegyptia_T3262_T3267		HLGQFNNMIKCTIPGSTPWWDFSDYGCYCGYG(GSGTPVDQLDRCCQTHDNCYTEAQKFSGCSPYTRKYSYECSEGTLTCKSDNDECAAFVCNCDRSAAICFARAPYNSNNVDIDLEAHCQ)[24.05230]
			13331.6	4.32918e+07	0.0114627	pdb|2OSH|A Chain A, Crystal Structure Of Natratoxin		NLYQFKNMIQCTVPSRSWCD(FADYGCYCGKGGSGTPVDDLDRCCQVHDNCYNEAEKISGCWPYFKTYSYECSQGTLTCKGGNNACAAAVCDCDRLAAICFAGAPYTDANYNIDLK)[236.08233]ARCQ
			13098.5	6.98114e+07	0.0184845	sp|P00600.1|PA2A2_NAJME RecName: Full=Acidic phospholipase A2 DE-II		NLYQFKNMIQCTVPNRSWWHFANYGCYCGRGGSGTPVDDLDRCCQIHDNCYGEAEKISGCWPYIKTYTYESCQGTLTSCGANNK(CAASVCDCDRVAANCFARA)[-319.26385]TYNDKNYNIDFNARCQ
			13187.2	7.6937e+07	0.0203712	NGF_W.aegyptia_T0231_Complete NGF_W.aegyptia_T0231_Complete		EDHPVHNLGEYSVCDHISAWVTKTTATDIKGNTVIVMEDVNLNNEVYKQYFFETKCRNPNPEPSGCKGIDSSHWNSYCTETDTFVKALTME(GNQASWRFIRINTSCVCVISRKTENF)[-163.05682]
			13336.3	3.55157e+08	0.0940378	PLA2_Walterinnesia.aegyptia_T3262_T3267		HLGQFNNMIKCTIPGSTPWWDFSDYGCYCGYGGS(GTPVDQLDRCCQTHDNCYTEAQKFSGCSPYTRKYSYECSEGTLTCKSDNDE)[-9.93820]CAAFVCNCDRSAAICFARAPYNSNNVDIDLEAHCQ
			13334.3	3.55157e+08	0.0940378	NGF_W.aegyptia_T0231_Complete NGF_W.aegyptia_T0231_Complete		EDHPVHNLGEYSVCDHISAWVTKTTATDIKGNTVIVMEDVNLNNEVYKQYFFETKCRNPNPEPSGCKGIDSSHWNSYCTETDTFVKALTMEGNQASWRFIRINTSCVCVISRKTE(NF)[-15.99290]
			12856.1	1.4486e+08	0.0383558	NGF_W.aegyptia_T0231_Complete NGF_W.aegyptia_T0231_Complete		VHNLGEYSVCDHISAWVTKTTATDIKGNTVIVMEDVNLNNEVYKQYFFETKCRNPNPEPSGCKGIDSSHWNSYCTETDTFVKALTMEGNQASWRFIRINT(SCVCVI)[-15.98624]SRKTENF
			13350.6	6.58718e+07	0.0174414	PLA2_Walterinnesia.aegyptia_T3262_T3267		HLGQFNNMIKCTIPGSTPWWD(F)[4.40315]SDYGCYCGYGGSGTPVDQLDRCCQTHDNCYTEAQKFSGCSPYTRKYSYECSEGTLTCKSDNDECAAFVCNCDRSAAICFARAPYNSNNVDIDLEAHCQ
			13348.6	6295446316	1.6669	PLA2_Walterinnesia.aegyptia_T3262_T3268		HLGQFNNMIKCTIPGSTPWW(D)[2.07072]FSDYGCYCGYGGSGTPVDQLDRCCQTHDNCYTEAQKFSGCSPYTRKYSYECSEGTLTCKSDNDECAAFVCNCDRSAAICFARAPYNSNNVDIDLEAHCQ
			13344.6	1057057609	0.279886	PLA2_Walterinnesia.aegyptia_T3262_T3269		HLGQFNNMIKCTIPGSTPWWDFSD(Y)[-1.95157]GCYCGYGGSGTPVDQLDRCCQTHDNCYTEAQKFSGCSPYTRKYSYECSEGTLTCKSDNDECAAFVCNCDRSAAICFARAPYNSNNVDIDLEAHCQ
				3.77674e+11	100

## Sheet: W. aegyptia (Sinai)
			Table S2.	Bottom-up and Top-down MS/MS identification of peptides/proteins in the RP-HPLC fractions of the venom of adult Walterinnesia aegyptia (Sinai, Egypt) displayed in Figure 2A to toxin family classes and specific venom proteins. C, carbamidomethyl cysteine.
				RP-HPLC/ SDS-PAGE proteome decomplexation. ▼, reduced ; ∎, non-reduced. # = manual comparison between different venoms by MS1, MS2 and RT, but no TD annotation by Toppic
							Bottom-up MS									Top-Down MS						Top-Down MS/ Mass profiling
																Monoisotopic mass			Protein	GenBank Database code/
			RP-HPLC peak	%	MW (kDa)		ESI-MS (mono)	ESI-MS (ave)	m/z	z	Peptide sequence	Score	Best NCBI match	Protein family		Native	Reduced	E-value	Family	UniProtKB/Swiss-Prot code		Amino acid sequence
			1	11.2985	13 ▼		6848.4	6852	617	3	KGIELHCCTTDQCNL	98	W. aegyptia C1IC47	3FTx W-III		6848.07	6856.14	5.5852e-21	3FTx	ABX82864		FVCHNQQSSQPPTTTNCSGGENKCYKKQWSDHRGSITERGCGCPTVKKGIKLHCCTTEKCNN
									860.9	2	GIELHCCTTDQCNL
							6662.1	6668.0					W. aegyptia C1IC48	Kunitz inhibitor IV		6662.01	6668.06	5.17314e-22	KUN	ABX82870		GGPKYCHLPADPGPCSNYRPAYYYNPASRKCEEFMYGGCKGNKNNFKTRHECHRVCVR
	INDEX		2	2.94703	13 ▼		6848.4	6852.0	617	3	KGIELHCCTTDQCNL	89	W. aegyptia C1IC47	3FTx W-III		6848.07	6856.14	5.5852e-21	3FTx	ABX82864		FVCHNQQSSQPPTTTNCSGGENKCYKKQWSDHRGSITERGCGCPTVKKGIKLHCCTTEKCNN
	Table S1								860.856	2	GIELHCCTTDQCNL
	Table S2			2.94703	6▼		6342.9	6349.0	748.1	4	YCHLPADPGPCSNYRPAYYYNPASR	190	W. aegyptia C1IC50	Kunitz inhibitor I		6342.95	6349	1.51578e-32	KUN	ABX82867		RPGLCELPAETGPCKARIRAFYYNPHSHKCLEFTYGGCKGNANNFKTIDECNRTCVG
	Table S3								470.2	3	KCEEFMYGGCK
	Table S4								640.8	2	CEEFMYGGCK
	Table S5		3	2.22415	13 ▼		6848.4	6852	860.9	2	GIELHCCTTDQCNL	50	W. aegyptia C1IC47	3FTx W-III		6848.07	6856.14	5.5852e-21	3FTx	ABX82864		FVCHNQQSSQPPTTTNCSGGENKCYKKQWSDHRGSITERGCGCPTVKKGIKLHCCTTEKCNN
	Table S6			2.22415	6▼		6342.9	6349.0	618.3	2	CLEFTYGGCK	91	W.aegyptia C1IC50	Kunitz inhibitor I		6342.95	6349	1.51578e-32	KUN	ABX82867		RPGLCELPAETGPCKARIRAFYYNPHSHKCLEFTYGGCKGNANNFKTIDECNRTCVG
	Table S7						6775.3	6781.0	470.194	3	KCEEFMYGGCK	61	W. aegyptia C1IC53	Kunitz inhibitor IV		6775.09	6781.14	1.5053e-16	KUN	ABX82870		LGGPKYCHLPADPGPCSNYRPAYYYNPASRKCEEFMYGGCKGNKNNFKTRHECHRVCVR
	Table S8								860.855	2	GIELHCCTTDQCNL	39	W.aegyptia C1IC48	3FTx W-IV
							7329.2	7333.6						3FTx Actiflagelin		7329.17	7339.26	1.96606e-11	ACTI	C0HKZ8		MECYKCGVSGCHLKITCSAEEKFCYKWRDKISNERWLGCAKTCTEENTWRVYNSCCTTNLCNT
			4	0.0682716	13 ▼				860.9	2	GIELHCCTTDQCNL	96	W.aegyptia C1IC48	3FTx W-IV
				0.204815	6▼		6618.2	6622	474.3	2	NGENLCIK	104	W.aegyptia C1IC49	3FTx W-V		6617.91	.	2.28767e-05	3FTx	~ P82849		LECHNQQSSQTPTTTGCSGGENNCYKKEWRDNRGYRTERGCGCPSVKKGIGINCCTTD(RC)[-239.1135]NN.
									571.3	2	TFYEGNLLGK
							7394.5	7408.9					W.aegyptia C1IC49	3FTx W-V		7394.47	7404.54	3.1088e-11	3FTx	ABX82866		LTCLICPKKYCNQVHTCRNGENLCIKTFYEGNLLGKQFKRGCAATCPEARPREIVECCSRDKCNH
			5	3.40563	6▼		6390.0	6394.0	571.3	2	TFYEGNLLGK	279	W. aegyptia C1IC52	Kunitz inhibitor II		6389.86	6395.91	2.18408e-44	KUN	ABX82869		RPRLCELPAESGLCNAYIPSFYYNPHSHKCQKFMYGGCGGNANNFKTIDECHRTCVG
									772.9	2	TFYEGNLLGKQFK
									567.7	3	TFYEGNLLGKQFKR
									690.7	3	NGENLCIKTFYEGNLLGK
				4.22612	6▼		6601.1	6606.0	768.9	2	FMYGGCGGNANNFK	148	W.aegyptia C1IC51/C1IC52	KUN
									767.6	4	LCELPAESGLCNAYIPSFYYNPHSHK
			6	4.0707	6▼		7394.6	7399	571.3	2	TFYEGNLLGK	126	W. aegyptia C1IC49	3FTx W-V		7394.47	7404.54	3.1088e-11	3FTx	ABX82866		LTCLNCPEVYCRKFHTCRNGENICFKRFDQRKLLGKRYTRGCAATCPEAKPRETVECCSTDKCN
									690.7	3	NGENLCIKTFYEGNLLGK
				0.342683	6▼		6406	6410	768.9	2	FMYGGCGGNANNFK	97	W.aegyptia C1IC51	Kunitz inhibitor III
									598.8	2	TCTEENTWR	65	W.aegyptia C0HKZ8	3FTx
																6601.91	.	4.52443e-06	3FTx	P01402		LECYQKSKVVTCQPEQKFCYSDTMTFFPNHPVYLSGCTFCRTDESGERCCTTD(R)[-23.9851]CNK
			7	0.756819	13 ▼				571.3	2	TFYEGNLLGK	78	W.aegyptia C1IC49	3FTx
									884.1	3	(844.5)TPVDCPDGQNXCFQR	de novo	~ D.angusticeps Q8QGR0	3FTx
				0.084091	6▼		7362.4	7367	598.8	2	TCTEENTWR	70	W.aegyptia C0HKZ8	3FTx
									571.3	2	TFYEGNLLGK	78	W.aegyptia C1IC49	3FTx
									502.8	2	LTCLICPK	de novo	W.aegyptia C1IC49	3FTx
									509.8	2	LTCPROLICPK	de novo	W.aegyptia C1IC49	3FTx
							7347.8	7352.9	903.9	2	RTPVDCPDGBNXCFK	de novo	~ MTLP-2 [Naja kaouthia]	3FTx		7347.3	7354.4	1.20901e-05	3FTx	~ P82463		LTCVKYYTIFGVTPVDCPD(GQN)[67.07381]LCFKRWHMMAPGRYDITRGCAATCPKAENHDSIECCSTDKCNL
			8	21.179	18▼		13334.3	13341	448.7	2	SAAICFAR	507	W. aegyptia C1IC46	PLA2-I		13333.5	13347.6	#	PLA2	C1IC46		HLGQFNNMIKCTIPGSTPWWDFSDYGCYCGYGGSGTPVDQLDRCCQTHDNCYTEAQKFSGCSPYTRKYSYECSEGTLTCKSDNDECAAFVCNCDRSAAICFARAPYNSNNVDIDLEAHCQ
									537.8	2	FSGCSPYTR
									916.9	2	SDNDECAAFVCNCDR
									980.4	2	APYNSNNVDIDLEAHCQ
									718.3	4	CCQTHDNCYTEAQKFSGCSPYTR
									1137.8	3	YSYECSEGTLTCKSDNDECAAFVCNCDR
									885.6	4	KYSYECSEGTLTCKSDNDECAAFVCNCDR
			9	6.26686	18▼		13334.3	13341.1	448.7	2	SAAICFAR	243	W. aegyptia C1IC46	PLA2-I		13333.5	13347.6	#	PLA2	C1IC46		HLGQFNNMIKCTIPGSTPWWDFSDYGCYCGYGGSGTPVDQLDRCCQTHDNCYTEAQKFSGCSPYTRKYSYECSEGTLTCKSDNDECAAFVCNCDRSAAICFARAPYNSNNVDIDLEAHCQ
									537.8	2	FSGCSPYTR
									916.9	2	SDNDECAAFVCNCDR
									654	3	APYNSNNVDIDLEAHCQ
			10	8.85698	18▼		13334.8	13341	799.3	2	YSYECSEGTLTCK	191	W. aegyptia C1IC46	PLA2-I	13333.5	13333.5	13347.6	#	PLA2	C1IC46		HLGQFNNMIKCTIPGSTPWWDFSDYGCYCGYGGSGTPVDQLDRCCQTHDNCYTEAQKFSGCSPYTRKYSYECSEGTLTCKSDNDECAAFVCNCDRSAAICFARAPYNSNNVDIDLEAHCQ
									916.9	2	SDNDECAAFVCNCDR
				0.984109			13335.6	13342.4	487.2	2	FSGCSPYR	179	W.aegyptia C1IC45	PLA2-II		13335.5	13349.6	#	PLA2	ABX82862		HLGQFNNMIKCTIPGSTPWWDFSDYGCYCGYGGSGTPVDQLDRCCQTHDNCYTEAQKFSGCSPYRRKYSYECSEGTLTCKSDNDECAAFVCNCDRLAAICFAGAPYNSNNVDIDLEARCQ
					6▼		7378.7	7383	721.3	2	GEAQVYVDCMNR	de novo	~ NLP2 [Naja atra]	3FTx		7378.5	7386.57	#	3FTX	~ Q9W717		(RLCLS)[14.0135]DYSIFSETIEICPDGHNFCFKKFPKGITRLPWVIRGCAAT(CPKAE)[-40.0788]ARVYVDCCARDKCNR
			11	3.43243	18▼		13334.8	13342.9	487.2	2	FSGCSPYR	376	W.aegyptia C1IC45	PLA2-II		13335.5	13349.6	#	PLA2	ABX82862		HLGQFNNMIKCTIPGSTPWWDFSDYGCYCGYGGSGTPVDQLDRCCQTHDNCYTEAQKFSGCSPYRRKYSYECSEGTLTCKSDNDECAAFVCNCDRLAAICFAGAPYNSNNVDIDLEARCQ
									799.3	2	YSYECSEGTLTCK
									916.9	2	SDNDECAAFVCNCDR
									832.1	3	LAAICFAGAPYNSNNVDIDLEAR
									448.7	2	SAAICFAR	303	W.aegyptia C1IC46	PLA2-I
									537.8	2	FSGCSPYTR
				0.220654	16▼		13322.2	13329.2	646.8	2	INTACVCVISR	376	W. aegyptia AEH59581	vNGF		13328.2	13334.3	#	VNGF	AEH59581		EDHPVHNLGEYSVCDHISAWVTKTTATDIKGNTVIVMEDVNLNNEVYKQYFFETKCRNPNPEPSGCKGIDSSHWNSYCTETDTFVKALTMEGNQASWRFIRINTACVCVISRKTENF
									690.3	2	ALTMoxEGNQASWR
									1026	2	GNTVIVMEDVNLNNEVYK
									749.7	3	GIDSSHWNSYCTETDTFVK
			12	0.33	>116 ∎				677.4	2	VYEMVNXXNMK	de novo	~ A.superbus ABH10621	PIII-SVMP
									877.4	2	(290.1)DECDXPEXCTGR	de novo	~ A.engaddensis AAF01042	PIII-SVMP
									504.3	2	TFTPEQER	de novo	~ A.superbus ABH10621	PIII-SVMP
				5.94	80 ∎				649.3	2	SAECPTDSFQR	67	D. vestigiata ABK63559	PIII-SVMP
									677.4	2	VYEMVNXXNMK	de novo	~ A.superbus ABH10621	PIII-SVMP
									487.3	2	XVMVEPGTK	de novo	~ N.scutatus XP_026536946	PIII-SVMP
				0.33	28 ∎			26681.9	598.3	2	EIVDLHNSLR	107	N. atra Q7T1K6	CRISP
									634.3	2	QSSCQDDWIK
			13	0.09999	33▼				575.8	2	SVSPTASNMoxLK	110	O. hannah Q7ZT98	CRISP
									598.3	2	EIVDLHNSLR
									584.8	2	NVDFNSESTR
				0.09999	30▼				575.8	2	SVSPTASNMoxLK	190	O. hannah Q7ZT98	CRISP
									598.3	2	EIVDLHNSLR
									484.6	3	QKEIVDLHNSLR
									634.3	2	QSSCQDDWIK	165	N. atra Q7T1K6	CRISP
				0.10302	27▼			25037.9	567.8	2	SVSPTASNMLK	284	O. hannah Q7ZT98	CRISP
									598.3	2	EIVDLHNSLR
									484.6	3	QKEIVDLHNSLR
									918.8	3	NFVYGVGANPPGSVTGHYTQIVWYK
									634.3	2	QSSCQDDWIK	142	N. atra Q7T1K6	CRISP
			14	0.114626	33▼				598.3	2	EIVDLHNSLR	155	O. hannah Q7ZT98	CRISP
									918.8	3	NFVYGVGANPPGSVTGHYTQIVWYK
									634.3	2	QSSCQDDWIK	144	N. atra Q7T1K6	CRISP
				0.076417	30▼			25020.83	575.8	2	SVSPTASNMoxLK	323	O. hannah Q7ZT98	CRISP
									598.3	2	EIVDLHNSLR
									484.6	3	QKEIVDLHNSLR
									918.8	3	NFVYGVGANPPGSVTGHYTQIVWYK
									584.8	2	NVDFNSESTR
				0.191043	27▼				598.3	2	EIVDLHNSLR	294	O. hannah Q7ZT98	CRISP
									575.8	2	SVSPTASNMoxLK
									611.3	3	AWTEIIQLWHDEYK
									634.3	2	QSSCQDDWIK	185	N. atra Q7T1K6	CRISP
			15	0.636131	>116 ∎				598.3	2	EIVDLHNSLR	129	O. hannah Q7ZT98	CRISP
									575.8	2	SVSPTASNMoxLK
				0.318065	80 ∎				575.8	2	SVSPTASNMoxLK	122	O. hannah Q7ZT98	CRISP
									598.3	2	EIVDLHNSLR
				0.318065	57 ∎				649.3	2	SAECPTDSFQR	74	D. vestigiata ABK63559	PIII-SVMP
									487.3	2	XVMVEPGTK	de novo	~ N.scutatus XP_026536946	PIII-SVMP
									491.6	3	(494.3)FPEXCTGR	de novo	~ N.mossambica Q10749	PIII-SVMP
				0.318065	39 ∎				598.3	2	EIVDLHNSLR	138	N. atra Q7T1K6	CRISP
									634.3	2	QSSCQDDWIK
									567.8	2	SVSPTASNMLK	103	O. hannah Q7ZT98	CRISP
				1.59033	25 ∎			25021	575.8	2	SVSPTASNMoxLK	122	O. hannah Q7ZT98	CRISP
									598.3	2	EIVDLHNSLR
									584.8	2	NVDFNSESTR
				3.18065	22 ∎				575.8	2	SVSPTASNMoxLK	324	O. hannah Q7ZT98	CRISP
									598.3	2	EIVDLHNSLR
									484.6	3	QKEIVDLHNSLR
									918.8	3	NFVYGVGANPPGSVTGHYTQIVWYK
									634.3	2	QSSCQDDWIK	213	N. atra Q7T1K6	CRISP
									584.8	2	NVDFNSESTR	181	N. annulifera P0DL15	CRISP
			16	0.0658555	80 ∎				649.3	2	SAECPTDSFQR	70	D. vestigiata ABK63559	PIII-SVMP
				0.00197475	80 ∎				598.3	2	EIVDLHNSLR	64	O. hannah Q7ZT98	CRISP
									869.4	2	AAMDECDXPEXCGTR	de novo	~ A.engaddensis AAF01040	PIII-SVMP
									801.4	2	VYEMVNXXNMYGR	de novo	~ N. mossambica Q10749	PIII-SVMP
									487.3	2	XVMVEPGTK	de novo	~ N.scutatus XP_026536946	PIII-SVMP
				1.22094	56 ∎				649.3	2	SAECPTDSFQR	83	D. vestigiata ABK63559	PIII-SVMP
									736.8	2	HDCDLPELCTGR	de novo	~ P. textilis XP_026570661	PIII-SVMP
				0.0678303	22 ∎				575.8	2	SVSPTASNMoxLK	213	O. hannah Q7ZT98	CRISP
									598.3	2	EIVDLHNSLR
									634.3	2	QSSCQDDWIK	194	N. atra Q7T1K6	CRISP
									584.8	2	NVDFNSESTR	165	N. annulifera P0DL15	CRISP
			17	0.266	>116▼				546.8	2	TLGMLMEGLK	107	M. lebetina AHJ80885	PDE
									567.8	2	NPFYNPSPAK
									678.4	2	AATYFWPGSEVK
				0.399	97▼				554.8	2	TLGMoxLMEGLK	224	M. lebetina AHJ80885	PDE
									567.8	2	NPFYNPSPAK
									678.4	2	AATYFWPGSEVK
									472.3	2	QPLSETLR	150	T. sirtalis XP_013908397	PDE
				0.149367	60▼				618.3	2	VTLDLFGEWR	69	E. coloratus ADI47614	PIII-SVMP
									649.3	2	SAECPTDSFKR	de novo	~ P. australis ABQ01134	PIII-SVMP
				0.115633	60▼				419.3	3	FPILSANIKPR	de novo	~ P. flavoviridis ABQ01135	5'Nucleotidase
			18	0.216809	>116 ∎				509.3	2	VTLLEASER	266	N. atra A8QL58	LAO
									600.9	2	IYFEPPLPPK
									448.9	3	KFWEADGIHGGK
									565.8	2	NDDLFSYEK	131	B. fasciatus A8QL52	LAO
				0.00684132	>116 ∎				618.3	2	VTLDLFGEWR	63	E. coloratus ADI47614	PIII-SVMP
				0.1091	116∎				509.3	2	VTLLEASER	266	N. atra A8QL58	LAO
									600.9	2	IYFEPPLPPK
									565.8	2	NDDLFSYEK	56	B. fasciatus A8QL52	LAO
				7.01	60 ∎				509.3	2	VTLLEASER	550	N. atra A8QL58	LAO
									600.9	2	IYFEPPLPPK
									448.9	3	KFWEADGIHGGK
									664.9	2	IYFEPPLPPKK
									670.8	2	EGWYVNMGPMR
									449.3	3	KFWEADGIHGGK
									745.8	3	HVVVVGAGMAGLSAAYVLAGAGHK
			19	0.582	62 ∎				509.3	2	VTLLEASER	103	N. atra A8QL58	LAO
									670.3	2	EGWYVNMGPMR
			20	0.2412	57 ∎				821.4	2	ENDVPIPCAQEDVR	190	E. p. leakeyiADI47681	PIII-SVMP
									924.4	3	NDCDLPEYCTGQSAECPTDVFHR
									652	3	YLISHTPQCILNEPLR	64	B. atrox C5H5D4	PIII-SVMP
				0.1608	55 ∎				618.3	2	VTLDLFGEWR	56	E. coloratus ADI47614	PIII-SVMP
				99.9998

## Sheet: W. aegyptia (Riyadh)
			Table S3. Bottom-up and Top-down MS/MS identification of peptides/proteins in the RP-HPLC fractions of the venom of adult Walterinnesia aegyptia (Riyadh, Saudi Arabia) displayed in Figure 2B to toxin family classes and specific venom proteins. C, carbamidomethyl cysteine.
				▼, reduced ; ∎, non-reduced. # = manual comparison between different venoms by MS1, MS2 and RT, but no TD annotation by Toppic
			RP-HPLC/ SDS-PAGE proteome decomplexation				Bottom-up MS									Top-Down MS						Top-Down MS/ Mass profiling
																Monoisotopic mass			Protein	GenBank Database code/
			RP-HPLC peak	%	MW (kDa)		ESI-MS (mono)	ESI-MS (ave)	m/z	z	Peptide sequence	Score	Best NCBI match	Protein family		Native	Reduced	E-value	Family	UniProtKB/Swiss-Prot code		Amino acid sequence
			1	0.689541	13▼		6848	6852	507.9	3	(258.2)TERGCGCPTVK	de novo	W. aegyptia C1IC47	3FTx W-III		6848.07	6856.14	6.0084e-22	3FTx	ABX82864		FVCHNQQSSQPPTTTNCSGGENKCYKKQWSDHRGSITERGCGCPTVKKGIKLHCCTTEKCNN
	INDEX		2	5.32598	21▼				507.9	3	(258.2)TERGCGCPTVK	de novo		3FTx W-III
	Table S1			21.97	13▼		6848	6852	860.9	2	GIELHCCTTDQCNL	de novo	W. aegyptia C1IC47	3FTx W-III		6848.07	6856.14	6.0084e-22	3FTx	ABX82864		FVCHNQQSSQPPTTTNCSGGENKCYKKQWSDHRGSITERGCGCPTVKKGIKLHCCTTEKCNN
	Table S2		3	0.0190192	21▼				507.9	3	(258.2)TERGCGCPTVK	de novo		3FTx W-III
	Table S3			0.361365	13▼		6864.0	6868.0	617	3	KGIELHCCTTDQCNL	71	W. aegyptia C1IC47	3FTx W-III		6864.08	6872.1	#	3FTx			FVCHNQQSSQP(PTTTNCSGGENKCYKKRWSTHRGTITERGCGCPTVKKGIELHCCTTDQC)[1.98903]NL
	Table S4								860.9	2	GIELHCCTTDQCNL
	Table S5		4	0.133028	21▼				617	3	KGIELHCCTTDQCNL	42	W. aegyptia C1IC47	3FTx W-III
	Table S6								860.9	2	GIELHCCTTDQCNL
	Table S7						6662.9	6666.7	847.4	3	LLCHNQQSSTSPTTTCCSGGESK	de novo	W. aegyptia C1IC48	3FTx W-IV		6663.01	6672.02	#	3FTX			LCHNQQSSTSPTTTCCSGGESKCYKKRWPTHRGTITERLGCGCPTVKKGIELHCCTTDQCNL
	Table S8			3.32571	13▼				847.4	3	LLCHNQQSSTSPTTTCCSGGESK	de novo	W. aegyptia C1IC48	3FTx W-IV
									617	3	KGIELHCCTTDQCNL	71		3FTx W-IV
									860.9	2	GIELHCCTTDQCNL
				0.975541	6▼		6342.0/6662.0	6347.0/6666.1	748.1	4	YCHLPADPGPCSNYRPAYYYNPASR	238	W.aegyptia C1IC50	Kunitz inhibitor I		6342.95	6349	1.56906e-28	KUN	ABX82867		RPGLCELPAETGPCKARIRAFYYNPHSHKCLEFTYGGCKGNANNFKTIDECNRTCVG
				1.03					470.2	3	KCEEFMYGGCK			Kunitz inhibitor IV		6662.02	6668.06	1.23378e-20	KUN	ABX82870		GGPKYCHLPADPGPCSNYRPAYYYNPASRKCEEFMYGGCKGNKNNFKTRHECHRVCVR
									475.5	3	KCEEFMoxYGGCK					6775.08	6781.11	#	KUN	ABX82870		LGGPKYCHLPADPGPCSNYRPAYYYNPASRKCEEFMYGGCKGNKNNFKTRHECHRVCVR
									418.2	3	HECHRVCVR
			5	0.027127	25▼				617.8	2	CLEFTYGGCK	44	W. aegyptia C1IC50	Kunitz inhibitor I
				0.54254	21▼				617	3	KGIELHCCTTDQCNL	82	W. aegyptia C1IC48	3FTx W-IV
									860.9	2	GIELHCCTTDQCNL
				1.60049	13▼				924.9	2	KGIELHCCTTDQCNL	159	W. aegyptia C1IC48	3FTx W-IV
									860.9	2	GIELHCCTTDQCNL
									512.6	3	GTITERGCGCPTVK
									847.4	3	LLCHNQQSSTSPTTTCCSGGESK	de novo	~W. aegyptia C1IC48	3FTx W-IV
									860.1	3	FVCHNQQSSQPPTTTNCSGGENK	de novo	~W. aegyptia C1IC47	3FTx W-III
				0.54254	6▼		6342.9	6346.8	617.8	2	CLEFTYGGCK	175	W.aegyptia C1IC50	Kunitz inhibitor I		6342.95	6349	1.56906e-28	KUN	ABX82867		RPGLCELPAETGPCKARIRAFYYNPHSHKCLEFTYGGCKGNANNFKTIDECNRTCVG
									662.8	2	TIDECNRTCVG
									660.6	3	CLEFTYGGCKGNANNFK
									748.1	4	YCHLPADPGPCSNYRPAYYYNPASR	131	W. aegyptia C1IC53	Kunitz inhibitor IV
							7329.2	7339.3	598.8	2	TCTEENTWR	115	W. aegyptia C0HKZ8	Actiflagelin-T		7329.17	7339.25	1.96606e-11	ACTI	C0HKZ8		MECYKCGVSGCHLKITCSAEEKFCYKWRDKISNERWLGCAKTCTEENTWRVYNSCCTTNLCNT
									512.6	3	ITCSAEEKFCYK
			6	0.0760538	25▼				860.9	2	GIELHCCTTDQCNL	48	W. aegyptia C1IC48	3FTx W-IV
				0.0123286	25▼				617.8	2	CLEFTYGGCK	48	W.aegyptia C1IC50	Kunitz inhibitor I
									924.9	2	KGIELHCCTTDQCNL	83	W. aegyptia C1IC48	3FTx W-IV
									491.3	3	QWSDHRGSITER	77	W. aegyptia C1IC47	3FTx W-III
				5.72	13 ▼				617	3	KGIELHCCTTDQCNL	113	W. aegyptia C1IC48	3FTx W-IV
									860.9	2	GIELHCCTTDQCNL
									847.4	3	LLCHNQQSSTSPTTTCCSGGESK
									439.7	2	GCGCPTVK
				0.730757	6▼		6188.6/6351.7/6618.8	6190.0/6357.0/6623.0	617.8	2	CLEFTYGGCK	129	W. aegyptia C1IC50	Kunitz inhibitor I
									660.6	3	CLEFTYGGCKGNANNFK
									768.8	2	FMYGGCGGNANNFK	86	W. aegyptia C1IC51	Kunitz inhibitor III
							7394.5	7404.6	474.8	2	NGENLCIK		W. aegyptia C1IC49	3FTx W-V		7394.47	7404.54	#	3FTx	ABX82866		LTCLICPKKYCNQVHTCRNGENLCIKTFYEGNLLGKQFKRGCAATCPEARPREIVECCSRDKCNH
									571.3	2	TFYEGNLLGK
				0.59498	6▼				598.8	2	TCTEENTWR	76	W. aegyptia C0HKZ8	3FTx
									512.6	3	ITCSAEEKFCYK
									617	3	KGIELHCCTTDQCNL	68	W. aegyptia C1IC48	3FTx W-IV
									860.9	2	GIELHCCTTDQCNL
			7	0.918681	18 ▼				768.8	2	FMYGGCGGNANNFK	71	W. aegyptia C1IC51	Kunitz inhibitor III
									617.8	2	CLEFTYGGCK	70	W. aegyptia C1IC50	Kunitz inhibitor I
				1.83736	13 ▼				617	3	KGIELHCCTTDQCNL	74	W. aegyptia C1IC48	3FTx W-IV
									860.9	2	GIELHCCTTDQCNL
									598.8	2	TCTEENTWR	69	W.aegyptia C0HKZ8	3FTx
				4.29866	6▼		6389.8	6393.8	768.8	2	FMYGGCGGNANNFK	186	W. aegyptia C1IC52	Kunitz inhibitor II		6389.86	6395.91	4.7584e-42	KUN	C1IC52		RPRLCELPAESGLCNAYIPSFYYNPHSHKCQKFMYGGCGGNANNFKTIDECHRTCVG
									465.7	2	TIDECHR
									767.6	4	LCELPAESGLCNAYIPSFYYNPHSHK
							6089.9	6094	536.58	3	FMYGGCKGNKNNFK		W. aegyptia C1IC50	Kunitz inhibitor I		6089.79	6095.85	3.2598e-08	KUN	ABX82867		GLCELPAETGPCKARIRAFYYNPHSHKCLEFTYGGCKGNANNFKTIDECNRTCVG
				2.1321	6▼				474.8	2	NGENLCIK	95	W. aegyptia C1IC49	3FTx W-V
									571.3	2	TFYEGNLLGK
							7329.2	7333.3	598.8	2	TCTEENTWR	69	W. aegyptia C0HKZ8	Actiflagelin-T		7329.17	7339.25	1.96606e-11	ACTI	C0HKZ8		MECYKCGVSGCHLKITCSAEEKFCYKWRDKISNERWLGCAKTCTEENTWRVYNSCCTTNLCN(P)[4.2452]
			8	0.157185	18 ▼				776.8	2	FMoxYGGCGGNANNFK	110	W. aegyptia C1IC52	Kunitz inhibitor II
				0.558119	18 ▼				474.8	2	NGENLCIK	80	W. aegyptia C1IC49	3FTx W-V
									571.3	2	TFYEGNLLGK
				0.0274106	13 ▼				768.8	2	FMYGGCGGNANNFK	127	W. aegyptia C1IC51	Kunitz inhibitor III
									767.6	4	LCELPAESGLCNAYIPSFYYNPHSHK
				0.687893	13 ▼				474.8	2	NGENLCIK	107	W. aegyptia C1IC49	3FTx W-V
									571.3	2	TFYEGNLLGK
									617	3	KGIELHCCTTDQCNL	91	W. aegyptia C1IC48	3FTx W-IV
									860.9	2	GIELHCCTTDQCNL
									598.8	2	TCTEENTWR	68	W. aegyptia C0HKZ8	3FTx
				0.334406	6▼				768.8	2	FMYGGCGGNANNFK	135	W. aegyptia C1IC51	Kunitz inhibitor III
				1.81151	6▼		7329.1/7395.2	7333.0/7399.0	474.8	2	NGENLCIK	93	W. aegyptia C1IC49	3FTx W-V		7394.43	7404.52	#	3FTx	ABX82866		LTCLNCPEVYCRKFHTCRNGENICFKRFDQRKLLGKRYTRGCAATCPEAKPRETVECCSTDKCN
									571.3	2	TFYEGNLLGK
									598.8	2	TCTEENTWR	68	W. aegyptia C0HKZ8	3FTx		7329.17	7339.25	1.96606e-11	ACTI	C0HKZ8		MECYKCGVSGCHLKITCSAEEKFCYKWRDKISNERWLGCAKTCTEENTWRVYNSCCTTNLCN(P)[4.2452]
									617.8	2	CLEFTYGGCK	59	W. aegyptia C1IC50	Kunitz inhibitor I
			9	0.0451611	31 ▼				649.3	2	SAECPTDSFQR	72	D. vestigiata ABK63559	DC-domain/PIII-SVMP
				0.0451611	18 ▼				768.8	2	FMYGGCGGNANNFK	67	W. aegyptia C1IC51	Kunitz inhibitor III
									617.8	2	CLEFTYGGCK	61	W. aegyptia C1IC50	Kunitz inhibitor I
				0.0903223	13 ▼				617	3	KGIELHCCTTDQCNL	93	W. aegyptia C1IC48	3FTx W-IV
									860.9	2	GIELHCCTTDQCNL
				0.0955707	6▼		6405.8	6409.9	776.8	2	FMoxYGGCGGNANNFK	172	W. aegyptia C1IC52	Kunitz inhibitor II		6405.59	6411.91	1.22156e-09	KUN	C1IC52		RPRLCELPAESGLCNAYIPSFYYN(PHSHKCQKFM)[15.9979]YGGCGGNANNFKTIDECHRTCVG
									767.6	4	LCELPAESGLCNAYIPSFYYNPHSHK
				0.175396	6▼				474.8	2	NGENLCIK	77	W. aegyptia C1IC49	3FTx W-V
									571.3	2	TFYEGNLLGK
			10	0.2202	24▼				487.2	2	FSGCSPYR	205	W. aegyptia C1IC45	Acidic PLA2 PL-II
									799.3	2	YSYECSEGTLTCK
									916.9	2	SDNDECAAFVCNCDR
									601.3	2	GGSGTPVDKLDR	64	B. caeruleus Q6SLM0	PLA2
				0.7808			6367.7	6363.9					W. aegyptia C1IC52	Kunitz inhibitor II		6367.72	6363.93	5.921e-14	KUN	C1IC52		RPRLCELPAESGLCNAYIPSFYYNPHSHKCQKFMYGGC(GGNANNFKTID)[-31.9707]ECHRTCVG.
							6389.9	6395.9					W. aegyptia C1IC52	Kunitz inhibitor II		6389.86	6395.91	4.7584e-42	KUN	C1IC52		RPRLCELPAESGLCNAYIPSFYYNPHSHKCQKFMYGGCGGNANNFKTIDECHRTCVG.
				0.103	13▼		7347.3	7351.3	617	3	KGIELHCCTTDQCNL	98	~ MTLP-2 [Naja kaouthia]	3FTx		7347.3	7354.4	1.20901e-05	3FTx	~ P82463		LTCVKYYTIFGVTP(VDCPDGQNLCFKRWHMMAPGRYDITRGCAATCPKAENHDFIKCCSTDKCNL)[6.9972].
									860.9	2	GIELHCCTTDQCNL
			11	0.0984	24▼			13343.6/13375.0	487.2	2	FSGCSPYR	222	W. aegyptia C1IC45	Acidic PLA2 PL-II		13335.6	13349.7	6.67338e-10	PLA2	ABX82862		HLGQFNNMIKCTIPGSTPWWDFSDYGCYCGYGGSGTPVDQLDRCCQTHDNCYTEAQKFSGCSPYRRKYSYECSEGTLTCKSDNDECAAFVCNCDRLAAICFAGAPYNSNNVDIDLEARCQ [-10.08].
									799.3	2	YSYECSEGTLTCK
									916.9	2	SDNDECAAFVCNCDR
				0.0250847	13▼		12767.12	12775.30	646.8	2	INTACVCVISR	96	W. aegyptia AEH59581	vNGF		12767.02	12773.02	#	NGF	AEH5981		HNLGEYSVCDHISAWVTKTTATDIKGNTVIVMEDVNLNNEVYKQYFFETKCRNPNPEPSGCKGIDSSHWNSYCTETDTFVKALTMEGNQASWRFIRINTSCVCVISRKTENF
				0.0405153	13▼		6848.0/7516.4	6852.3/7521.0	617	3	KGIELHCCTTDQCNL	77	W. aegyptia C1IC48	3FTx W-IV
									860.9	2	GIELHCCTTDQCNL
			12	0.4098	24▼				487.2	2	FSGCSPYR	149	W. aegyptia C1IC45	Acidic PLA2 PL-II
									799.3	2	YSYECSEGTLTCK
									916.9	2	SDNDECAAFVCNCDR
									601.3	2	GGSGTPVDKLDR	66	B. caeruleus Q6SLM0	PLA2
				1.2294	16▼				487.2	2	FSGCSPYR	165	W. aegyptia C1IC45	Acidic PLA2 PL-II
									575.9	3	KYSYECSEGTLTCK
									916.9	2	SDNDECAAFVCNCDR
				0.132471	11▼			13360.0/13375.0/12761.0	487.2	2	FSGCSPYR	175	W. aegyptia C1IC45	Acidic PLA2 PL-II
									799.3	2	YSYECSEGTLTCK
									916.9	2	SDNDECAAFVCNCDR
				0.277329	11▼		13322.2	13329.2	646.8	2	INTACVCVISR	376	W. aegyptia AEH59581	vNGF		13328.2	13334.3	#	VNGF	AEH59581		EDHPVHNLGEYSVCDHISAWVTKTTATDIKGNTVIVMEDVNLNNEVYKQYFFETKCRNPNPEPSGCKGIDSSHWNSYCTETDTFVKALTMEGNQASWRFIRINTACVCVISRKTENF
									481.8	2	QYFFETK
			13		16▼		7378.4/7363.8	7384.9/7368.9	903.9	2	RTPVDCPDGBNXCFK	de novo	~ NLP2 [Naja atra]	3FTx		7378.5	7386.54	#	3FTx	~ Q9W717		(RLCLS)[14.0135]DYSIFSETIEICPDGHNFCFKKFPKGITRLPWVIRGCAAT(CPKAE)[-40.0788]ARVYVDCCARDKCNR
									832	3	(945.5)PVDCPDGBNXCFK	de novo	~ D. angusticeps Q8QGR0	3FTx
				15.12			13335.6	13342.4	799.3	2	YSYECSEGTLTCK	252	W.aegyptia C1IC45	Acidic PLA2 PL-II		13335.6	13349.7	6.67338e-10	PLA2	ABX82862		HLGQFNNMIKCTIPGSTPWWDFSDYGCYCGYGGSGTPVDQLDRCCQTHDNCYTEAQKFSGCSPYRRKYSYECSEGTLTCKSDNDECAAFVCNCDRLAAICFAGAPYNSNNVDIDLEARCQ
									575.9	3	KYSYECSEGTLTCK
									916.9	2	SDNDECAAFVCNCDR
			14	1.262	16▼		13335.6/7257,4	13343.0/7262.0	487.2	2	FSGCSPYR	234	W.aegyptia C1IC45	Acidic PLA2 PL-II		13335.6	13349.7	6.67338e-10	PLA2	ABX82862		HLGQFNNMIKCTIPGSTPWWDFSDYGCYCGYGGSGTPVDQLDRCCQTHDNCYTEAQKFSGCSPYRRKYSYECSEGTLTCKSDNDECAAFVCNCDRLAAICFAGAPYNSNNVDIDLEARCQ
									799.3	2	YSYECSEGTLTCK
									916.9	2	SDNDECAAFVCNCDR
									601.3	2	GGSGTPVDKLDR	63	B. caeruleus Q6SLM0	PLA2
			15	0.315	16▼		13335.2	13019.0/13343.0	799.3	2	YSYECSEGTLTCK	187	W.aegyptia C1IC45	Acidic PLA2 PL-II		13335.6	13349.7	6.67338e-10	PLA2	ABX82862		HLGQFNNMIKCTIPGSTPWWDFSDYGCYCGYGGSGTPVDQLDRCCQTHDNCYTEAQKFSGCSPYRRKYSYECSEGTLTCKSDNDECAAFVCNCDRLAAICFAGAPYNSNNVDIDLEARCQ
									916.9	2	SDNDECAAFVCNCDR
									601.3	2	GGSGTPVDKLDR	65	B. caeruleus Q6SLM0	PLA2
			16	0.1435	21▼									n.r
				0.1435	6▼		7240.4	7244	721.3	2	(201.1)AQVYVDCCAR	de novo	~ H. haemachatus C0HJT5	3FTx
			17	0.8	70▼				649.3	2	SAECPTDSFQR	69	P. australisABQ01134	PIII-SVMP
				0.08	58▼				649.3	2	SAECPTDSFQR	69	P. australisABQ01134	PIII-SVMP
									541.5	2	CXXNBPVEK	de novo	~ A. engaddensis AAF01040	PIII-SVMP
				0.08	45▼				649.3	2	SAECPTDSFQR	70	P. australisABQ01134	PIII-SVMP
				0.08	36▼				598.3	2	EIVDLHNSLR	123	O. hannah Q7ZT98	CRISP
									575.8	2	SVSPTASNMoxLK
				0.16	32▼				567.8	2	SVSPTASNMLK	329	O. hannah Q7ZT98	CRISP
									598.3	2	EIVDLHNSLR
									484.6	3	QKEIVDLHNSLR
									499.2	3	SKCPASCFCHNK
									611.3	3	AWTEIIQLWHDEYK
									584.8	2	NVDFNSESTR
				0.16	28▼				567.8	2	SVSPTASNMLK	205	O. hannah Q7ZT98	CRISP
									598.3	2	EIVDLHNSLR
									484.6	3	QKEIVDLHNSLR
									584.8	2	NVDFNSESTR
				0.16	26▼				567.8	2	SVSPTASNMLK	192	O. hannah Q7ZT98	CRISP
									598.3	2	EIVDLHNSLR
									584.8	2	NVDFNSESTR
				0.08	11▼				646.8	2	INTACVCVISR	209	W.aegyptia AEH59581	vNGF
									481.8	2	QYFFETK
									690.3	2	ALTMoxEGNQASWR
			18	0.02925	70▼				567.8	2	SVSPTASNMLK	120	O. hannah Q7ZT98	CRISP
									598.3	2	EIVDLHNSLR
				0.00782095	36▼				598.3	2	EIVDLHNSLR	102	N.atra Q7T1K6	CRISP
									634.3	2	QSSCQDDWIK
									567.8	2	SVSPTASNMLK	96	O. hannah Q7ZT98	CRISP
				0.0214291	36▼				652	3	YLISHTPQCILNEPLR	80	B. atrox C5H5D4	SVMP
									441.8	4	VAVTMoxTHELGHNLGIR	76	C.d.durissus ABA42116	SVMP
				0.117	32▼				575.8	2	SVSPTASNMoxLK	167	O. hannah Q7ZT98	CRISP
									598.3	2	EIVDLHNSLR
									584.8	2	NVDFNSESTR
				0.117	28▼				567.8	2	SVSPTASNMLK	322	O. hannah Q7ZT98	CRISP
									598.3	2	EIVDLHNSLR
									484.6	3	QKEIVDLHNSLR
									499.2	3	SKCPASCFCHNK
									611.3	3	AWTEIIQLWHDEYK
									584.8	2	NVDFNSESTR
				0.234	26▼				567.8	2	SVSPTASNMLK	176	O. hannah Q7ZT98	CRISP
									598.3	2	EIVDLHNSLR
									499.2	3	SKCPASCFCHNK
									584.8	2	NVDFNSESTR
				0.0585	11▼		13322.2	13329.2	646.8	2	INTACVCVISR	89	W.aegyptia AEH59581	vNGF		13328.2	13334.3	#	VNGF	AEH59581		EDHPVHNLGEYSVCDHISAWVTKTTATDIKGNTVIVMEDVNLNNEVYKQYFFETKCRNPNPEPSGCKGIDSSHWNSYCTETDTFVKALTMEGNQASWRFIRINTACVCVISRKTENF
									481.8	2	QYFFETK
			19	0.05955	70▼				649.3	2	SAECPTDSFQR	72	P. australisABQ01134	PIII-SVMP
									637.3	3	(328.2)AFQFSSCSVQEHR	de novo	~P. chamissonisAJB84503	PIII-SVMP
									728.4	2	(236.2)CDLPELCTGR	de novo	~P. textilisXP_026570661	PIII-SVMP
				0.0241822	36▼				567.8	2	SVSPTASNMLK	176	O. hannah Q7ZT98	CRISP
									598.3	2	EIVDLHNSLR
									584.8	2	NVDFNSESTR
				0.0353678	36▼				487.2	2	FSGCSPYR	146	W.aegyptia C1IC45	Acidic PLA2 PL-II
									916.9	2	SDNDECAAFVCNCDR
				0.42876	32▼				567.8	2	SVSPTASNMLK	195	O. hannah Q7ZT98	CRISP
									598.3	2	EIVDLHNSLR
									484.6	3	QKEIVDLHNSLR
									584.8	2	NVDFNSESTR
				0.42876	28▼				567.8	2	SVSPTASNMLK	164	O. hannah Q7ZT98	CRISP
									598.3	2	EIVDLHNSLR
									611.3	3	AWTEIIQLWHDEYK
									584.8	2	NVDFNSESTR
				0.05955	26▼				567.8	2	SVSPTASNMLK	248	O. hannah Q7ZT98	CRISP
									598.3	2	EIVDLHNSLR
									611.3	3	AWTEIIQLWHDEYK
									584.8	2	NVDFNSESTR
									918.8	3	NFVYGVGANPPGSVTGHYTQIVWYK
				0.05955	22▼				567.8	2	SVSPTASNMLK	228	O. hannah Q7ZT98	CRISP
									598.3	2	EIVDLHNSLR
									484.6	3	QKEIVDLHNSLR
									584.8	2	NVDFNSESTR
									918.8	3	NFVYGVGANPPGSVTGHYTQIVWYK
				0.09528	11▼				598.3	2	EIVDLHNSLR	95	N.atra Q7T1K6	CRISP
									634.3	2	QSSCQDDWIK
			20	1.22538	43 ∎				567.8	2	SVSPTASNMLK	349	O. hannah Q7ZT98	CRISP
									598.3	2	EIVDLHNSLR
									484.6	3	QKEIVDLHNSLR
									584.8	2	NVDFNSESTR
									442.6	3	NVDFNSESTRR
									611.3	3	AWTEIIQLWHDEYK
									918.8	3	NFVYGVGANPPGSVTGHYTQIVWYK
				6.12689	28 ∎				567.8	2	SVSPTASNMLK	377	O. hannah Q7ZT98	CRISP
									598.3	2	EIVDLHNSLR
									484.6	3	QKEIVDLHNSLR
									584.8	2	NVDFNSESTR
									442.6	3	NVDFNSESTRR
									611.3	3	AWTEIIQLWHDEYK
									918.8	3	NFVYGVGANPPGSVTGHYTQIVWYK
				4.90151	24 ∎			24898	567.8	2	SVSPTASNMLK	356	O. hannah Q7ZT98	CRISP
									598.3	2	EIVDLHNSLR
									484.6	3	QKEIVDLHNSLR
									584.8	2	NVDFNSESTR
									611.3	3	AWTEIIQLWHDEYK
									918.8	3	NFVYGVGANPPGSVTGHYTQIVWYK
									634.3	2	QSSCQDDWIK	205	N.atra Q7T1K6	CRISP
			21	0.414621	70 ∎				649.3	2	SAECPTDSFQR	74	P. australisABQ01134	PIII-SVMP
									637.3	3	(328.2)AFQFSSCSVQEHR	de novo	~P. chamissonisAJB84503	PIII-SVMP
									487.3	2	XVMVEPGTK	de novo	~N. scutatus XP_026536946	PIII-SVMP
									626.3	2	WAVVQDYSQR	de novo	~ N. atra D3TTC2	PIII-SVMP
				0.414621	60 ∎				736.8	2	HDCDLPELCTGR	de novo	~P. textilis XP_026570661	PIII-SVMP
									637.3	3	(328.2)AFQFSSCSVQEHR	de novo	~P. chamissonisAJB84503	PIII-SVMP
									487.3	2	XVMVEPGTK	de novo	~N. scutatus XP_026536946	PIII-SVMP
									626.3	2	WAVVQDYSQR	de novo	~ N. atra D3TTC2	PIII-SVMP
				0.414621	43 ∎				567.8	2	SVSPTASNMLK	176	O. hannah Q7ZT98	CRISP
									598.3	2	EIVDLHNSLR
									484.6	3	QKEIVDLHNSLR
									584.8	2	NVDFNSESTR
									611.3	3	AWTEIIQLWHDEYK
				0.829243	28 ∎				567.8	2	SVSPTASNMLK	257	O. hannah Q7ZT98	CRISP
									598.3	2	EIVDLHNSLR
									584.8	2	NVDFNSESTR
				2.07311	24 ∎			25021	567.8	2	SVSPTASNMLK	366	O. hannah Q7ZT98	CRISP
									598.3	2	EIVDLHNSLR
									484.6	3	QKEIVDLHNSLR
									584.8	2	NVDFNSESTR
									611.3	3	AWTEIIQLWHDEYK
									918.8	3	NFVYGVGANPPGSVTGHYTQIVWYK
									634.3	2	QSSCQDDWIK	211	N.atra Q7T1K6	CRISP
			22	0.12934	>116▼				554.8	2	TLGMoxLMEGLK	175	M. lebetina AHJ80885	PDE
									567.8	2	NPFYNPSPAK
									678.4	2	AATYFWPGSEVK
									472.3	2	QPLSETLR	142	T. sirtalis XP_013908397	PDE
				0.32934	97▼				472.3	2	QPLSETLR	209	T. sirtalis XP_013908397	PDE
									567.8	2	NPFYNPSPAK
									635.8	2	LPDNLWVEER
				0.33932	58▼				635.8	2	LPDNLWVEER	66	T. sirtalis XP_013908397	PDE
			23	1.734	64▼				509.3	2	VTLLEASER	221	N. atra A8QL58	LAO
									600.8	2	IYFEPPLPPK
									443.6	3	IYFEPPLPPKK
									670.3	2	EGWYVNMGPMR
			24	0.25	60 ∎				600.8	2	IYFEPPLPPK	80	N. atra A8QL58	LAO
				0.25	50 ∎				509.3	2	VTLLEASER	121	N. atra A8QL58	LAO
				100.001					600.8	2	IYFEPPLPPK

## Sheet: W. morgani
			Table S4. Bottom-up and Top-down MS/MS identification of peptides/proteins in the RP-HPLC fractions of the venom of adult Walterinnesia morgani (Çörten village, Turkey) displayed in Figure 2C to toxin family classes and specific venom proteins. C, carbamidomethyl cysteine.
				▼, reduced ; ∎, non-reduced.
			RP-HPLC/ SDS-PAGE proteome decomplexation						Bottom-up MS									Top-Down MS						Top-Down MS/ Mass profiling
																		Monoisotopic mass			Protein	GenBank Database code/
			RP-HPLC peak	%			MW (kDa)		ESI-MS (mono)	ESI-MS (ave)	m/z	z	Peptide sequence	Score	Best NCBI match	Protein family		Native	Reduced	E-value	Family	UniProtKB/Swiss-Prot code		Amino acid sequence
			1	1.7353			20 ▼				491.238	3	QWSDHRGSITER	92	W. aegyptia C1IC47	3FTx W-III
	INDEX			21.6177			14 ▼		6848.02	6852.06	491.238	3	QWSDHRGSITER	94	W. aegyptia C1IC47	3FTx W-III		6848.04	6856.11	5.2032e-34	3FTx	ABX82864		FVCHNQQSSQPPTTTNCSGGENKCYKKQWSDHRGSITERGCGCPTVKKGIKLHCCTTEKCNN
	Table S1		2	3.2			18 ▼				491.238	3	QWSDHRGSITER	69	W. aegyptia C1IC47	3FTx W-III
	Table S2			1.6362			14 ▼				491.238	3	QWSDHRGSITER	67	W. aegyptia C1IC47	3FTx W-III
	Table S3								6662.1	6668.3	860.856	2	GIELHCCTTDQCNL	37	W. aegyptia C1IC48	3FTx W-IV								LCHNQQSSTSPTTTCCSGGESKCYKKRWPTHRGTITERGCGCPTVKKGIELHCCTTDQCNL
	Table S4			0.68175			6▼		6661.9	6666.1	640.74	2	CEEFMYGGCK	178	W. aegyptia C1IC53	Kunitz inhibitor IV		6661.99	6668.04	1.78608e-35	KUN	ABX82870		GGPKYCHLPADPGPCSNYRPAYYYNPASRKCEEFMYGGCKGNKNNFKTRHECHRVCVR
	Table S5								6343.0	6348.2	617.766	2	CLEFTYGGCK	47	W. aegyptia C1IC50	Kunitz inhibitor I		6342.93	6348.98	4.51611e-41	KUN	ABX82867		RPGLCELPAETGPCKARIRAFYYNPHSHKCLEFTYGGCKGNANNFKTIDECNRTCVG
	Table S6		3	0.0055			18 ▼				860.855	2	GIELHCCTTDQCNL	98	W. aegyptia C1IC48	3FTx W-IV
	Table S7			0.03575			14 ▼				860.855	2	GIELHCCTTDQCNL	93	W. aegyptia C1IC48	3FTx W-IV
	Table S8										616.542	3	KGIELHCCTTDQCNL			3FTx W-IV
				0.01375			6▼		6343.0	6348.0	662.784	2	TIDECNRTCVG	69	W. aegyptia C1IC50	Kunitz inhibitor I		6342.93	6348.98	4.51611e-41	KUN	ABX82867		RPGLCELPAETGPCKARIRAFYYNPHSHKCLEFTYGGCKGNANNFKTIDECNRTCVG
									6775.3	6781.0	470.194	3	KCEEFMYGGCK	61	W. aegyptia C1IC53	Kunitz inhibitor IV		6775	6781.13	4.39752e-31	KUN			LGGPKYCHLPADPGPCSNYRPAYYYNPASRKCEEFMYGGCKGNKNNFKTRHECHRVCVR
			4	0.51102			18 ▼				860.855	2	GIELHCCTTDQCNL	39		3FTx W-IV
				1.56145			14 ▼				860.855	2	GIELHCCTTDQCNL	50	W. aegyptia C1IC48	3FTx W-IV
				0.76653			6▼		6343	6348.0	640.803	2	CEEFMYGGCK	60	W. aegyptia C1IC50	Kunitz inhibitor I
			5	0.4239			18 ▼		6775.3	6781.0	860.854	2	GIELHCCTTDQCNL	28	W. aegyptia C1IC53	Kunitz inhibitor IV
				1.5543			14 ▼				860.855	2	GIELHCCTTDQCNL	93	W. aegyptia C1IC48	3FTx W-IV
				0.424			6▼				617.765	2	CLEFTYGGCK	52	W. aegyptia C1IC50	Kunitz inhibitor I
				0.424					6636.1/6897.5	6641.0/6902.0	640.74	2	CEEFMYGGCK	40	W. aegyptia C1IC53	Kunitz inhibitor IV
			6	0.1462			18 ▼				860.855	2	GIELHCCTTDQCNL	93	W. aegyptia C1IC48	3FTx W-IV
				0.6579			14 ▼				571.29	2	TFYEGNLLGK	37	W. aegyptia C1IC49	3FTx W-V
				0.6579			6▼		5793.4	5796.0	768.82	2	FMYGGCGGNANNFK	70	W. aegyptia C1IC51/C1IC52	Kunitz inhibitor III/II		5793.44	5799.54	#	KUN	C1IC51/C1IC52		PWFCELPAE(TGLCKAHIPSFHYNLAAQQCLGFIYG)[-343.17021]GCGGNANRFKTIDECHRTCVG
											617.765	2	CLEFTYGGCK	57	W. aegyptia C1IC50	Kunitz inhibitor-I
									6618.2	6622	474.3	2	NGENLCIK	104	W.aegyptia C1IC49	3FTx W-V
											571.3	2	TFYEGNLLGK
									7329.2	7333.3	598.8	2	TCTEENTWR	69	W. aegyptia C0HKZ8	3FTx-Actiflagellin		7330.15	7339.23	8.8526e-29	ACTI	C0HKZ8		MECYKCGVSGCHLKITCSAEEKFCYKWRDKISNERWLGCAKTCTEENTWRVYNSCCTTNLCN(P)[4.2452]
			7	1.0032			18▼		7394.4	7404.5	571.297	2	TFYEGNLLGK	41	W. aegyptia C1IC49	3FTx W-V		7394.45	7404.52	2.3324e-35	3FTx	ABX82866		LTCLNCPEVYCRKFHTCRNGENICFKRFDQRKLLGKRYTRGCAATCPEAKPRETVECCSTDKCN
				3.0288			6 ▼		6390.1	6393.9	768.82	2	FMYGGCGGNANNFK	133	W. aegyptia C1IC52	Kunitz inhibitor II		6389.86	6395.88	6.87504e-47	KUN	ABX82869		RPRLCELPAESGLCNAYIPSFYYNPHSHKCQKFMYGGCGGNANNFKTIDECHRTCVG
											767.606	3	LCELPAESGLCNAYIPSFYYNPHSHK		W. aegyptia C1IC52	Kunitz inhibitor II
			8	0.6979			32 ▼				649.3	2	SAECPTDSFBR	de novo	~D. vestigiata ABK63559	DC-domain/PIII-SVMP
				0.34895			18▼				598.754	2	TCTEENTWR	52	W. aegyptia C0HKZ8	3FTx-Actiflagellin
				0.587783			6 ▼		6407.2	6411.2	767.604	2	LCELPAESGLCNAYIPSFYYNPHSHK	57	W. aegyptia C1IC51/52	Kunitz inhibitor II/III
				5.34437			6 ▼				470.472	4	ITCSAEEKFCYKWR	44	W. aegyptia C0HKZ8	3FTx-Actiflagellin
									7394.0	7400.0	571.298	2	TFYEGNLLGK	34	W. aegyptia C1IC49	3FTx W-V
											502.8	2	LTCLICPK	de novo	~ W. aegyptia C1IC49	3FTx W-V
			9	0.466			10▼		7378.4/7363.8	7384.9/7368.9	903.9	2	RTPVDCPDGBNXCFK	de novo	~ NLP2 [Naja atra]	3FTx		7378.48	7386.54	1.12854e-14	3FTX	~ Q9W717		(RLCLS)[14.0135]DYSIFSETIEICPDGHNFCFKKFPKGITRLPWVIRGCAAT(CPKAE)[-40.0788]ARVYVDCCARDKCNR
											832	3	(945.5)PVDCPDGBNXCFK	de novo	~ D. angusticeps Q8QGR0	3FTx
			10	0.2682			22▼				448.224	2	SAAICFAR	192	W.aegyptia C1IC46	PLA2 PL-I
											537.737	2	FSGCSPYTR
											916.834	2	SDNDECAAFVCNCDR
											601.292	2	GGSGTPVDKLDR	52	M. altirostris F5CPF1	PLA2
				0.2682			16▼				799.327	2	YSYECSEGTLTCK	190	W. aegyptia C1IC46	PLA2 PL-I
											916.832	2	SDNDECAAFVCNCDR
											980.919	2	APYNSNNVDIDLEAHCQ
				0.8046			10▼		7347.8	7352.9	903.9	2	RTPVDCPDGBNXCFK	de novo	~ MTLP-2 [Naja kaouthia]	3FTx		7347.3	7354.4	1.20901e-05	3FTx	~ P82463		LTCVKYYTIFGVTPVDCPD(GQN)[67.07381]LCFKRWHMMAPGRYDITRGCAATCPKAENHDSIECCSTDKCNL
			11	0.564			22▼		13357.67	13366.74	487.212	2	FSGCSPYR	201	W. aegyptia C1IC45	PLA2 PL-II		13356.6	13370.6	2.02807e-10	PLA2	~ Acidic PLA2 PL-II		HLGQFNNMIKCTIPGSTPWWDFSDYGCYCGYG(GSGTPVDQLDRCCQTHDNCYTEAQKFSGCSPYTRKYSYECSEGTLTCKSDNDECAAFVCNCDRSAAICFARAPYNSNNVDIDLEAHCQ)[24.05230]
											916.832	2	SDNDECAAFVCNCDR
											537.736	2	FSGCSPYTR	118	W. aegyptia C1IC46	PLA2 PL-I
				10.709			16▼		13333.03	13341.66	863.375	2	KYSYECSEGTLTCK	274	W. aegyptia C1IC46	PLA2 PL-I		13333.5	13347.7	1.02266e-31	PLA2	C1IC46		HLGQFNNMIKCTIPGSTPWWDFSDYGCYCGYGGSGTPVDQLDRCCQTHDNCYTEAQKFSGCSPYTRKYSYECSEGTLTCKSDNDECAAFVCNCDRSAAICFARAPYNSNNVDIDLEAHCQ
											1258.85	3	CTIPGSTPWWDFSDYGCYCGYGGSGTPVDQLDR
											501.248	2	GTPVDELDR	39	P. australis P04057	PLA2
			12	0.0423			22▼				487.213	2	FSGCSPYR	218	W. aegyptia C1IC45	PLA2 PL-II
											916.829	2	SDNDECAAFVCNCDR
											832.069	3	LAAICFAGAPYNSNNVDIDLEAR
											448.224	2	SAAICFAR	167	W. aegyptia C1IC46	PLA2 PL-I
											653.952	3	APYNSNNVDIDLEAHCQ
				0.152792			16▼				916.833	2	SDNDECAAFVCNCDR	350	W. aegyptia C1IC45	PLA2 PL-II
											1247.56	2	LAAICFAGAPYNSNNVDIDLEAR
											1258.85	3	CTIPGSTPWWDFSDYGCYCGYGGSGTPVDQLDR
											448.225	2	SAAICFAR	279	W. aegyptia C1IC46	PLA2 PL-I
											980.92	2	APYNSNNVDIDLEAHCQ
									14199.1	14213.3	916.833	2	SDNDECAAFVCNCDR	340	W. aegyptia PLA2-II C1IC45	PLA2-II		14199	.	1.95634e-10	PLA2	C1IC45		SSIRPLPLHLGQFNNM(IKCTIPGSTPWWDFSDYGCYCGYGGSGTPVDQLDRCCQTH)[-12.1065]DNCYTEAQKFSGCSPYRRKYSYECSEGTLTCKSDNDECAAFVCNCDRLAAICFAGAPYNSNNVDIDLEARCQ.
											1247.56	2	LAAICFAGAPYNSNNVDIDLEAR
				0.00927208			16▼		13322.2	13329.2	749.659	3	GIDSSHWNSYCTETDTFVK	84	W. aegyptia AEH59581	vNGF		13328.2	13334.3	2.7114e-36	VNGF	AEH59581		EDHPVHNLGEYSVCDHISAWVTKTTATDIKGNTVIVMEDVNLNNEVYKQYFFETKCRNPNPEPSGCKGIDSSHWNSYCTETDTFVKALTMEGNQASWRFIRINTACVCVISRKTENF
									13348.6	13355.6	601.294	2	GGSGTPVDQLDR	47	W. aegyptia C1IC46	PLA2		13447	13460.7	2.30355e-14	PLA2	PLA2		HLGQFNNMIKCTIPGS(TPWWDFSDYGCYCGY)[17.37206]GGSGTPVDQLDRCCQTHDNCYTEAQKFSGCSPYTRKYSYECSEGTLTCKSDNDECAAFVCNCDRSAAICFARAPYNSNNVDIDLEAHCQ
				0.2115			6 ▼		7378.5	7384.0	432.687	2	GCAATCPK	44	~ NLP2 [Naja atra]	3FTx		7378	7388.49	4.48721e-21	3FTx	C1IC49		(RLCLS)[14.0135]DYSIFSETIEICPDGHNFCFKKFPKGITRLPWVIRGCAAT(CPKAE)[-40.0788]ARVYVDCCARDKCNR
									7329.2	7333.3	598.8	2	TCTEENTWR	69	W. aegyptia C0HKZ8	3FTx Actiflagelin		7239.23	7339.23	8.8526e-29	3FTX	C0HKZ8		MECYKCGVSGCHLKITCSAEEKFCYKWRDKISNERWLGCAKTCTEENTWRVYNSCCTTNLCN(P)[4.2452]
									13335.6	13342.4						PLA2		13335.5	13349.6	5.0512e-30	PLA2	ABX82862		HLGQFNNMIKCTIPGSTPWWDFSDYGCYCGYGGSGTPVDQLDRCCQTHDNCYTEAQKFSGCSPYRRKYSYECS(EGTLTCKSDNDECAAFVCNCDRLA)[1.9819]AICFAGAPYNSNNVDIDLEARCQ
			13	14.071			16▼		13333.11	13340.49	916.834	2	SDNDECAAFVCNCDR	319	W. aegyptia C1IC46	PLA2
											1247.6	2	LAAICFAGAPYNSNNVDIDLEAR
											1258.85	3	CTIPGSTPWWDFSDYGCYCGYGGSGTPVDQLDR
			14	0.0806			56 ▼									n.r
				0.1612			24 ▼				451.239	2	QLELNER	84	O. hannah ETE70050	VEGF
											856.884	2	QPDEVITFMTVFER
				0.1612			6 ▼		7210.5/7281.6	7214.0/7286.0						(3FTx)
			15	0.01995			55 ▼									PIII-SVMP
				0.13965			36 ▼									PIII-SVMP
				0.1596			22 ▼									PIII-SVMP
				0.0798			6 ▼		7194.3/7265.4	7198.0/7270.0						(3FTx)
			16	0.3934			>97∎				649.276	2	SAECPTDSFQR	51	D. vestigiata ABK63559	PIII-SVMP
				1.1472			66∎				694.857	2	YIEFYVVVDNK	178	T. carinatus ABQ01132	PIII-SVMP
											758.904	2	KYIEFYVVVDNK
											649.277	2	SAECPTDSFQR	80	D. vestigiata ABK63559	PIII-SVMP
				0.3934			27∎				758.903	2	KYIEFYVVVDNK	94	T. carinatus ABQ01132	PIII-SVMP
			17	0.0296			>116∎				758.903	2	KYIEFYVVVDNK	76	T. carinatus ABQ01132	PIII-SVMP
				0.0296			66∎				758.903	2	KYIEFYVVVDNK	81	T. carinatus ABQ01132	PIII-SVMP
				0.0148			30∎				598.326	2	EIVDLHNSLR	185	O. hannah Q7ZT98	CRISP
				0.0296			27∎				918.791	2	NFVYGVGANPPGSVTGHYTQIVWYK	243	O. hannah Q7ZT98	CRISP
											575.792	2	SVSPTASNMoxLK
											598.324	2	EIVDLHNSLR
											484.602	2	QKEIVDLHNSLR
											611.638	2	AWTEIIQLWHDEYK
											918.791	3	NFVYGVGANPPGSVTGHYTQIVWYK
				0.0444			24∎			24949	598.324	2	EIVDLHNSLR	247	O. hannah Q7ZT98	CRISP
											726.4	2	QKEIVDLHNSLR
											916.453	2	AWTEIIQLWHDEYK
											918.793	3	NFVYGVGANPPGSVTGHYTQIVWYK
			18	0.11255			66∎				758.903	2	KYIEFYVVVDNK	de novo	T. carinatus ABQ01132	PIII-SVMP
				0.56275			38∎				567.795	2	SVSPTASNMLK	163	O. hannah Q7ZT98	CRISP
											598.325	2	EIVDLHNSLR
											916.452	2	AWTEIIQLWHDEYK
				0.2251			27∎				567.795	2	SVSPTASNMLK	178	O. hannah Q7ZT98	CRISP
											598.325	2	EIVDLHNSLR
											918.794	3	NFVYGVGANPPGSVTGHYTQIVWYK
											584.8	2	NVDFNSESTR	101	N. annulifera P0DL15	CRISP
				1.1255			24∎				597.808	2	EIVDLHNSLR	210	O. hannah Q7ZT98	CRISP
											916.453	2	AWTEIIQLWHDEYK
											918.794	3	NFVYGVGANPPGSVTGHYTQIVWYK
				0.2251			22∎			24917	567.795	2	SVSPTASNMLK	314	O. hannah Q7ZT98	CRISP
											598.325	2	EIVDLHNSLR
											484.603	3	QKEIVDLHNSLR
											611.639	2	AWTEIIQLWHDEYK
											918.793	3	NFVYGVGANPPGSVTGHYTQIVWYK
			19	0.08575			>97∎				441.7	4	VAVTMoxTHELGHNLGIR	69	C. d. durissus ABA42116	PIII-SVMP
											649.278	2	SAECPTDSFQR	44	D. vestigiata ABK63559	PIII-SVMP
				0.08575			66∎				649.278	2	SAECPTDSFQR	83	D. vestigiata ABK63559	PIII-SVMP
				0.1715			55∎				708.86	2	YIEFYVVVDNR	93	C. nigrescens ABQ01139	PIII-SVMP
				0.151857			31∎				567.794	2	SVSPTASNMLK	226	O. hannah Q7ZT98	CRISP
											598.325	2	EIVDLHNSLR
											916.452	2	AWTEIIQLWHDEYK
				0.019643			31∎				832.069	3	LAAICFAGAPYNSNNVDIDLEAR	87	W. aegyptia C1IC45	PLA2
				0.1715			28∎				575.791	2	SVSPTASNMoxLK	176	O. hannah Q7ZT98	CRISP
											598.325	2	EIVDLHNSLR
											634.266	2	QSSCQDDWIK	103	N. atra Q7T1K6	CRISP
				0.5145			24∎				598.326	2	EIVDLHNSLR	258	O. hannah Q7ZT98	CRISP
											916.453	2	AWTEIIQLWHDEYK
											919.128	3	NFVYGVGANPPGSVTGHYTQIVWYK
											585.258	2	NVDFNSESTR	138	N. annulifera P0DL14	CRISP
				0.5145			22∎			24917.0/25039.0/25055.0	597.809	2	EIVDLHNSLR	270	O. hannah Q7ZT98	CRISP
											611.639	3	AWTEIIQLWHDEYK
											919.127	3	NFVYGVGANPPGSVTGHYTQIVWYK
											634.268	2	QSSCQDDWIK	163	N. atra Q7T1K6	CRISP
			20	0.3062			66∎				598.325	2	EIVDLHNSLR	164	O. hannah Q7ZT98	CRISP
											918.793	3	NFVYGVGANPPGSVTGHYTQIVWYK
				0.273448			55∎				598.326	2	EIVDLHNSLR	93	O. hannah Q7ZT98	CRISP
											611.304	3	AWTEIIQLWHDEYK
				0.0327521			55∎				708.859	2	YIEFYVVVDNR	73	C. nigrescens ABQ01139	PIII-SVMP
											736.8	2	HDCDXPEXCTGR	de novo	~ P. textilis XP_026570661	PIII-SVMP
				1.2248			38∎				597.808	2	EIVDLHNSLR	234	O. hannah Q7ZT98	CRISP
											484.259	3	QKEIVDLHNSLR
											916.453	2	AWTEIIQLWHDEYK
											918.792	3	NFVYGVGANPPGSVTGHYTQIVWYK
				3.062			24∎				450.907	3	EIVDLHNSLRR	332	O. hannah Q7ZT98	CRISP
											726.892	2	QKEIVDLHNSLR
											916.453	2	AWTEIIQLWHDEYK
				1.2248			22∎			24901.0/24917.0	916.451	2	AWTEIIQLWHDEYK	161	O. hannah Q7ZT98	CRISP
											918.792	3	NFVYGVGANPPGSVTGHYTQIVWYK
			21	0.23352			66∎				653.289	3	GLFSEDYTETHYAPDGR	119	N. kaouthia Q9PVK7	PIII-SVMP
											904.756	3	YEDTMoxQYEFQVNGEPVVLHLER
											649.277	2	SAECPTDSFQR	108	D. vestigiata ABK63559	PIII-SVMP
				0.3336			55∎				649.277	2	SAECPTDSFQR	219	D. vestigiata ABK63559	PIII-SVMP
											708.848	2	YIEFYVVVDNR
											772.9	2	KYIEFYVVVDNR
											736.8	2	HDCDLPELCTGR	de novo	~P. textilis XP_026570661	PIII-SVMP
				0.26688			38∎				598.325	2	EIVDLHNSLR	273	O. hannah Q7ZT98	CRISP
											484.6	3	QKEIVDLHNSLR
											918.8	3	NFVYGVGANPPGSVTGHYTQIVWYK
											634.3	2	QSSCQDDWIK	208	N. atra Q7T1K6	CRISP
				0.1668			28∎				634.265	2	QSSCQDDWIK	43	N. atra Q7T1K6	CRISP
				0.3336			24∎				598.325	2	EIVDLHNSLR	196	O. hannah Q7ZT98	CRISP
											916.453	2	AWTEIIQLWHDEYK
											916.453	2	AWTEIIQLWHDEYK
				2.0016			22∎			25039.0/25023.0	919.129	3	NFVYGVGANPPGSVTGHYTQIVWYK	150	O. hannah Q7ZT98	CRISP
			22	0.1035			>97∎				708.859	2	YIEFYVVVDNR	86	C. nigrescens ABQ01139	PIII-SVMP
				0.207			66∎				649.3	2	SAECPTDSFBR	de novo	~D. vestigiata ABK63559	PIII-SVMP
											504.2	2	TFTPEBER	de novo	~M. ikaheca AHZ08819	PIII-SVMP
				1.6146			55∎				708.859	2	YIEFYVVVDNR	99	C. nigrescens ABQ01139	PIII-SVMP
				0.00779424			36∎				649.277	2	SAECPTDSFQR	144	D. vestigiata ABK63559	PIII-SVMP
				0.0414			28∎				509.281	2	VTLLEASER	65	O. s. scutellatus Q4JHE3	LAO
				0.0414			24∎				575.792	2	EIVDLHNSLR	242	O. hannah Q7ZT98	CRISP
											598.324	2	EIVDLHNSLR
											484.603	3	QKEIVDLHNSLR
				0.0414			22∎				567.794	2	SVSPTASNMLK	247	O. hannah Q7ZT98	CRISP
											598.325	2	EIVDLHNSLR
											484.602	2	QKEIVDLHNSLR
											611.638	3	AWTEIIQLWHDEYK
											634.266	2	QSSCQDDWIK	188	N. atra Q7T1K6	CRISP
											584.764	2	NVDFNSESTR	156	N. annulifera P0DL15	CRISP
			23	0.0251942			>97▼				554.79	2	TLGMoxLMEGLK	114	M. lebetina AHJ80885	PDE
											567.783	2	NPFYNPSPAK
											678.335	2	AATYFWPGSEVK
				0.0398158			>97▼				509.282	2	VTLLEASER	71	O. s. scutellatus Q4JHE3	LAO
				0.02955			97▼				554.79	2	TLGMoxLMEGLK	199	M. lebetina AHJ80885	PDE
											507.589	3	SMoxQAIFLAHGPGFK
				0.4728			65▼				600.836	2	IYFEPPLPPK	107	O. s. scutellatus Q4JHE3	LAO
											452.926	3	RIYFEPPLPPK
				0.00156085			31▼				848.467	2	SSTFTLTNIVPQFIK	111	O. hannah ETE56723	Endonuclease
											704.014	3	GCQQTFAVVGAVPGDTYIAR
				0.0102592			31▼				618.323	2	VTLDLFGEWR	75	E. c. sochureki ADI47585	PIII-SVMP
											649.3	2	SAECPTDSFBR	de novo	~D. vestigiata ABK63559	PIII-SVMP
				0.01182			26▼				567.794	2	SVSPTASNMLK	268	O. hannah Q7ZT98	CRISP
											598.325	2	EIVDLHNSLR
											484.602	3	QKEIVDLHNSLR
											611.639	3	AWTEIIQLWHDEYK
			24	0.6487			>116∎				443.59	3	IYFEPPLPPKK	248	N. atra A8QL58	LAO
											670.298	2	EGWYVNMGPMR
											678.885	2	RIYFEPPLPPK
											745.737	3	HVVVVGAGMAGLSAAYVLAGAGHK
											565.753	2	NDDLFSYEK	220	B. fasciatus A8QL52	LAO
											1014.82	3	YTMoxGALTSFTPYQFQDYIETVAAPVGR
				0.470579			97∎				600.836	2	IYFEPPLPPK	343	N. atra A8QL58	LAO
											670.299	2	EGWYVNMGPMR
											745.737	3	HVVVVGAGMAGLSAAYVLAGAGHK
											526.792	2	IHLISDNQL	173	B. multicinctus A8QL51	LAO
				0.426821			97∎				453.737	2	ADFLEGVR	155	B. fasciatus AAC59905	Acetylcholinesterase
											543.332	2	ETQVLLGVVK
											834.092	3	VGAFGFLGLPGSPEAPGNMGLLDQR
				2.75697			66∎				509.282	2	VTLLEASER	370	O. s. scutellatus Q4JHE3	LAO
											443.591	3	IYFEPPLPPKK
											678.885	2	RIYFEPPLPPK
											745.738	3	HVVVVGAGMAGLSAAYVLAGAGHK
											670.299	2	EGWYVNMGPMR	369	N. atra A8QL58	LAO
											1014.82	3	YTMGALTSFTPYQFQDYIETVAAPVGR	239	B. fasciatus A8QL52	LAO
											526.79	2	IHLISDNQL	159	B. multicinctus A8QL51	LAO
				0.132176			66∎				453.737	2	ADFLEGVR	101	B. fasciatus AAC59905	Acetylcholinesterase
											896.943	3	DEGSYFLIYGLPGFSK
											509.277	2	VATQTGWVR	85	P. mucrosquamatus XP_015668657	Acetylcholinesterase
											588.8	2	XYFAGEYTGR	de novo	~ N. scutatus XP_026538830	LAO
				1.18201			55∎				664.883	2	IYFEPPLPPKK	345	N. atra A8QL58	LAO
											670.299	2	EGWYVNMGPMR
											751.07	3	HVVVVGAGMAGLSAAYVLAGAGHK
											1014.82	3	YTMoxGALTSFTPYQFQDYIETVAAPVGR	257	B. fasciatus A8QL52	LAO
											527.283	2	IHLISDNQL	207	B. multicinctus A8QL51	LAO
				0.0967366			55∎				713.038	3	AILQSGAPNAPWATVTPAESR	80	E. coloratus AHY20009	Acetylcholinesterase
											588.8	2	XYFAGEYTGR	de novo	~ N. scutatus XP_026538830	LAO
				0.32435			36∎				600.837	2	IYFEPPLPPK	352	N. atra A8QL58	LAO
											670.299	2	EGWYVNMGPMR
											745.737	3	HVVVVGAGMAGLSAAYVLAGAGHK
			25	0.0399711			65▼				600.836	2	IYFEPPLPPK	221	N. atra A8QL58	LAO
											686.294	2	EGWYVNMoxGPMoxR
											751.069	3	HVVVVGAGMoxAGLSAAYVLAGAGHK
				0.0113789			65▼				453.737	2	ADFLEGVR	159	B. fasciatus AAC59905	Acetylcholinesterase
											543.332	2	ETQVLLGVVK
											713.038	3	AILQSGAPNAPWATVTPAESR	124	E. coloratus AHY20009	Acetylcholinesterase
											526.79	2	IHLISDNQL	117	B. multicinctus A8QL51	LAO
											588.8	2	XYFAGEYTGR	de novo	~ N. scutatus XP_026538830	LAO
				0.17672			60▼				688.325	2	SSQLTNTPEQDR	120	N. mossambica Q10749	PIII-SVMP
											646.664	3	KYIEFYVVVDNVMYR
											618.325	2	VTLDLFGEWR	75	E. c. sochureki ADI47585	PIII-SVMP
				0.14393			55▼				651.997	3	KYIEFYVVVDNVMoxYR	88	N. mossambica Q10749	PIII-SVMP
				99.9995							618.325	2	VTLDLFGEWR	75	E. c. sochureki ADI47585	PIII-SVMP

## Sheet: Top-Down MS IDs
			Table S5. Non-redundant Top-Down MS identifications of proteins in the proteomes of Walterinnesia aegyptia and W. morgani venoms.# = manual comparison between different venoms by MS1, MS2 and RT, but no TD annotation by Toppic
			W. aegyptia (Sinai Peninsula, Egypt)					# = manual comparison between different venoms by MS1, MS2 and RT, but no TD annotation by Toppic
			RP-HPLC (Fig.3A)	TIC retention time (in min)	Observed SS-bridges	Native M(mono)	reduced M(mono)	E-value	Family	ID	Name	Sequence
			1	22.48	4	6848.07	6856.14	5.5852e-21	3FTx	ABX82864	Three-finger toxin III	T.FVCHNQQSSQPPTTTNCSGGENKCYKKQWSDHRGSITERGCGCPTVKKGIKLHCCTTEKCNN.
			1	22.48	3	6662.01	6668.06	5.17314e-22	KUN	ABX82870	Kunitz inhibitor IV	L.GGPKYCHLPADPGPCSNYRPAYYYNPASRKCEEFMYGGCKGNKNNFKTRHECHRVCVR.
			1	22.48	3	6775.09	6781.14	1.5053e-16	KUN	ABX82870	Kunitz inhibitor IV	G.LGGPKYCHLPADPGPCSNYRPAYYYNPASRKCEEFMYGGCKGNKNNFKTRHECHRVCVR.
	INDEX		2-3	34.08	3	6342.95	6349	1.51578e-32	KUN	ABX82867	Kunitz inhibitor I	G.RPGLCELPAETGPCKARIRAFYYNPHSHKCLEFTYGGCKGNANNFKTIDECNRTCVG.
	Table S1		2-3	34.08	5	7329.17	7339.26	1.96606e-11	ACTI	C0HKZ8	Actiflagelin (P63T)	.MECYKCGVSGCHLKITCSAEEKFCYKWRDKISNERWLGCAKTCTEENTWRVYNSCCTTNLCNT.
	Table S2		4	37.72	5	7394.47	7404.54	3.1088e-11	3FTx	ABX82866	Three-finger toxin V	.LTCLICPKKYCNQVHTCRNGENLCIKTFYEGNLLGKQFKRGCAATCPEARPREIVECCSRDKCNH.
	Table S3		5-6	39.39	4	6601.91	.	4.52443e-06	3FTx	P01402	Weak toxin CM-1b	.LECYQKSKVVTCQPEQKFCYSDTMTFFPNHPVYLSGCTFCRTDESGERCCTTD(R)[-23.9851]CNK.
	Table S4		5-6	39.39	3	6389.86	6395.91	2.18408e-44	KUN	ABX82869	Kunitz inhibitor II	G.RPRLCELPAESGLCNAYIPSFYYNPHSHKCQKFMYGGCGGNANNFKTIDECHRTCVG.
	Table S5		7	46.68-47.37	4	7378.5	7386.57	-	3FTX	Q9W717	NTL2 OS=Naja atra	T.(RLCLS)[14.0135]DYSIFSETIEICPDGHNFCFKKFPKGITRLPWVIRGCAAT(CPKAE)[-40.0788]ARVYVDCCARDKCNR.
	Table S6		7	46.68-47.37	4	7347.3	7354.4	1.20901e-05	3FTx	~ P82463	~ MTLP-2 [Naja kaouthia]	T.LTCVKYYTIFGVTP(VDCPDGQNLCFKRWHMMAPGRYDITRGCAATCPKAENHDFIKCCSTDKCNL)[6.9972].
	Table S7		8-9	57.47	7	13333.5	13347.6	#	PLA2-I	ABX82862	Acidic phospholipase A2 II	.HLGQFNNMIKCTIPGSTPWWDFSDYGCYCGYGGSGTPVDQLDRCCQTHDNCYTEAQKFSGCSPYRRKYSYECSEGTLTCKSDNDECAAFVCNCDRLAAICFAGAPYNSNNVDIDLEARCQ.
	Table S8		10-11	59.41	7	13335.5	13349.6	#	PLA2-II	ABX82862	Acidic phospholipase A2 II	.HLGQFNNMIKCTIPGSTPWWDFSDYGCYCGYGGSGTPVDQLDRCCQTHDNCYTEAQKFSGCSPYRRKYSYECS(EGTLTCKSDNDECAAFVCNCDRLA)[1.9819]AICFAGAPYNSNNVDIDLEARCQ.
			-	70.85	3	13328.2	13334.3	#	VNGF	AEH59581	Venom nerve growth factor	.EDHPVHNLGEYSVCDHISAWVTKTTATDIKGNTVIVMEDVNLNNEVYKQYFFETKCRNPNPEPSGCKGIDSSHWNSYCTETDTFVKALTMEGNQASWRFIRINTACVCVISRKTENF.
			W. aegyptia (Riyadh, SA)
			RP-HPLC (Fig.3B)	TIC retention time (in min)	Observed SS-bridges	Native M(mono)	reduced M(mono)	E-value	Family	ID	Name	Sequence
			1-2	22.36-24.34	4	6848.07	6856.14	6.0084e-22	3FTx	ABX82864	Three-finger toxin III	T.FVCHNQQSSQPPTTTNCSGGENKCYKKQWSDHRGSITERGCGCPTVKKGIKLHCCTTEKCNN.
			1-2	22.36-24.34	3	6662.02	6668.06	1.23378e-20	KUN	ABX82870	Kunitz inhibitor IV	L.GGPKYCHLPADPGPCSNYRPAYYYNPASRKCEEFMYGGCKGNKNNFKTRHECHRVCVR.
			1-2	22.36-24.34	3	6775.08	6781.11	#	KUN	ABX82870	Kunitz inhibitor IV	G.LGGPKYCHLPADPGPCSNYRPAYYYNPASRKCEEFMYGGCKGNKNNFKTRHECHRVCVR.
			3-4	31.44	3	6662.02	6668.06	1.23378e-20	KUN	ABX82870	Kunitz inhibitor IV	L.GGPKYCHLPADPGPCSNYRPAYYYNPASRKCEEFMYGGCKGNKNNFKTRHECHRVCVR.
			3-4	34.01	5	7329.17	7339.25	1.96606e-11	ACTI	C0HKZ8	Actiflagelin (P63T)	.MECYKCGVSGCHLKITCSAEEKFCYKWRDKISNERWLGCAKTCTEENTWRVYNSCCTTNLCNT.
			3-4	36.83	3	6089.79	6095.85	3.2598e-08	KUN	ABX82867	Kunitz inhibitor I	P.GLCELPAETGPCKARIRAFYYNPHSHKCLEFTYGGCKGNANNFKTIDECNRTCVG.
			3-4	36.83	3	6367.72	6363.93	5.921e-14	KUN	C1IC52	Kunitz-type serine protease inhibitor II	G.RPRLCELPAESGLCNAYIPSFYYNPHSHKCQKFMYGGC(GGNANNFKTID)[-31.9707]ECHRTCVG.
			7	40.01	3	6389.86	6395.91	4.7584e-42	KUN	ABX82869	Kunitz-type serine protease inhibitor II	G.RPRLCELPAESGLCNAYIPSFYYNPHSHKCQKFMYGGCGGNANNFKTIDECHRTCVG.
			9	42	3	6405.59	6411.91	1.22156e-09	KUN	C1IC52	Kunitz-type serine protease inhibitor II	G.RPRLCELPAESGLCNAYIPSFYYN(PHSHKCQKFM)[15.9979]YGGCGGNANNFKTIDECHRTCVG.
			10	49.06	4	7347.3	7354.4	1.20901e-05	3FTx	~ P82463	~ MTLP-2 [Naja kaouthia]	T.LTCVKYYTIFGVTP(VDCPDGQNLCFKRWHMMAPGRYDITRGCAATCPKAENHDFIKCCSTDKCNL)[6.9972].
			10-12	50	4	7378.5	7386.54	-	3FTx	Q9W717	NTL2 OS=Naja atra OX=8656 PE=3 SV=1	T.(RLCLS)[14.0135]DYSIFSETIEICPDGHNFCFKKFPKGITRLPWVIRGCAAT(CPKAE)[-40.0788]ARVYVDCCARDKCNR.
			13-15	60.10-61.50	7	13335.6	13349.7	6.67338e-10	PLA2-II	ABX82862	Acidic phospholipase A2 II	.HLGQFNNMIKCTIPGSTPWWDFSDYGCYCGYGGSGTPVDQLDRCCQTHDNCYTEAQKFSGCSPYRRKYSYECSEGTLTCKSDNDECAAFVCNCDRLAAICFA(GA)[2.0162]PYNSNNVDIDLEARCQ.
			17	70.66	3	13328.2	13334.3	#	VNGF	AEH59581	Venom nerve growth factor	.EDHPVHNLGEYSVCDHISAWVTKTTATDIKGNTVIVMEDVNLNNEVYKQYFFETKCRNPNPEPSGCKGIDSSHWNSYCTETDTFVKALTMEGNQASWRFIRINTACVCVISRKTENF.
			W. morgani (Çörten village, Turkey)
			RP-HPLC (Fig.3C)	TIC retention time (in min)	Observed SS-bridges	Native M(mono)	reduced M(mono)	E-value	Family	ID	Name	Sequence
			1	8.65	4	6848.04	6856.11	5.2032e-34	3FTx	ABX82864	Three-finger toxin III	.FVCHNQQSSQPPTTTNCSGGENKCYKKQWSDHRGSITERGCGCPTVKKGIKLHCCTTEKCNN.
			2	10.51	3	6661.99	6668.04	1.78608e-35	KUN	ABX82870	Kunitz inhibitor IV	L.GGPKYCHLPADPGPCSNYRPAYYYNPASRKCEEFMYGGCKGNKNNFKTRHECHRVCVR.
			3-4	15.14	5	7330.15	7339.23	8.8526e-29	ACTI	C0HKZ8	Actiflagelin (P63T)	.MECYKCGVSGCHLKITCSAEEKFCYKWRDKISNERWLGCAKTCTEENTWRVYNSCCTTNLCNT.
			3-4	15.14	3	6342.93	6348.98	4.51611e-41	KUN	ABX82867	Kunitz inhibitor I	G.RPGLCELPAETGPCKARIRAFYYNPHSHKCLEFTYGGCKGNANNFKTIDECNRTCVG.
			5-7	18.21	5	7394.45	7404.52	2.3324e-35	3FTx	ABX82866	Three-finger toxin V	.LTCLICPKKYCNQVHTCRNGENLCIKTFYEGNLLGKQFKRGCAATCPEARPREIVECCSRDKCNH.
			8	19.06	3	6389.86	6395.88	6.87504e-47	KUN	ABX82869	Kunitz inhibitor II	G.RPRLCELPAESGLCNAYIPSFYYNPHSHKCQKFMYGGCGGNANNFKTIDECHRTCVG.
			9	23	4	7347.3	7354.4	1.20901e-05	3FTx	~ P82463	~ MTLP-2 [Naja kaouthia]	T.LTCVKYYTIFGVTP(VDCPDGQNLCFKRWHMMAPGRYDITRGCAATCPKAENHDFIKCCSTDKCNL)[6.9972].
			11	28	4	7378.48	7386.54	1.12854e-14	3FTX	Q9W717	NTL2 OS=Naja atra	T.(RLCLS)[14.0135]DYSIFSETIEICPDGHNFCFKKFPKGITRLPWVIRGCAAT(CPKAE)[-40.0788]ARVYVDCCARDKCNR.
			11	28.67	7	13333.5	13347.7	1.02266e-31	PLA2-I	C1IC46	Acidic phospholipase A2 II	.HLGQFNNMIKCTIPGSTPWWDFSDYGCYCGYGGSGTPVDQLDRCCQTHDNCYTEAQKFSGCSPYRRKYSYECSEGTLTCKSDNDECAAFVCNCDRLAAICFAGAPYNSNNVDIDLEARCQ.
			13	29.76	7	13335.5	13349.6	5.0512e-30	PLA2-II	ABX82862	Acidic phospholipase A2 II	.HLGQFNNMIKCTIPGSTPWWDFSDYGCYCGYGGSGTPVDQLDRCCQTHDNCYTEAQKFSGCSPYRRKYSYECS(EGTLTCKSDNDECAAFVCNCDRLA)[1.9819]AICFAGAPYNSNNVDIDLEARCQ.
			13	30.8	0	7329.23	7339.23	8.8526e-29	3FTX	C0HKZ8	Actiflagelin (P63T)	.MECYKCGVSGCHLKITCSAEEKFCYKWRDKISNERWLGCAKTCTEENTWRVYNSCCTTNLCNT.
			16	36.17	3	13328.2	13334.3	2.7114e-36	VNGF	AEH59581	Venom nerve growth factor	.EDHPVHNLGEYSVCDHISAWVTKTTATDIKGNTVIVMEDVNLNNEVYKQYFFETKCRNPNPEPSGCKGIDSSHWNSYCTETDTFVKALTMEGNQASWRFIRINTACVCVISRKTENF.

## Sheet: W. aegyptia (Sinai) ICP-MS
			Table S6. Quantification by QQQ ICP-MS of the venom proteome of W. aegyptia (Sinai, peninsula, Egypt)
			Sample decomplexation and ESI-QToF mass profiling							Relative quantification								Absolute quantification
										ESI-QToF					mg S/mg venom			Sulfur atoms/molecule				Proteome composition calculations
			HPLC fraction	Protein family	Closest homologue			MW (Da)		Intensity (cps)	% of total cps	% of peak intensity	HPLC peak		individual ID	mmoles S/g weighted venom		[nº CYS]	[nº MET]	nº S		mmoles Toxin/ g weighted V	mgToxin/gV	mg/100 mg toxins		Protein matching by transcriptome-assisted top-down MS/MS analysis
			1	3FTX	C1IC47	3FTx W-III	W. aegyptia	6848.03		1610445	25.0516	85.4397	1.97792		1.69171	52.7587		8	0	8		6.59483	45.1616	6.79002		FVCHNQQSSQPPTTTNCSGGENKCYKKQWSDHRGSITERGCGCPTVKKGIKLHCCTTEKCNN
			2	3FTX	C1IC47	3FTx W-III	W. aegyptia	6900.97		83667	1.3015	4.43883			0.0878888	2.74096		8	0	8		0.34262	2.36441	0.355487		FVCHNQQSSQPPTT(TNCSGGENKCYKKRWST)[43.99544]HRGTITERGCGCPTVKKGIELHCCTTDQCNL
			3	3TTX	C1IC47	3FTx W-III	W. aegyptia	6830.03		57139	0.888839	3.03142			0.0600222	1.87189		6	1	7		0.267413	1.82644	0.274604		FVCHNQQSSQP(PTTTNCSGGENKCYKKRWST)[23.93812]HRGTITERGCGCPTVKKGIELHCCTTDQCNL
	INDEX		4	3FTX	C1IC47	3FTx W-III	W. aegyptia	6864.03		103060	1.60317	5.46769			0.10826	3.37628		8	0	8		0.422035	2.89686	0.435541		FVCHNQQSSQP(PTTTNCSGGENKCYKKRWSTHRGTITERGCGCPTVKKGIELHCCTTDQC)[1.98903]NL.
	Table S1		5	KUN	C1IC53	KUN Inh4	W. aegyptia	7010.02		30579	0.475679	1.62232			0.032122	1.00178		6	1	7		0.143111	1.00321	0.150832		(ISGLGGPKYCHLPADPGPCSNYRPAYYYNPASRKCEEFMYGGCKGNKNNFKTRHECHRVCVR)[ - 22.26]
	Table S2		6	3FTX	C1IC47	3FTx W-III	W. aegyptia	6886		195871	3.04692	92.2845	0.290147		0.267625	8.34633		8	0	8		1.04329	7.1841	1.08012		FVCHNQQSSQPPTT(TNCSGGENKCYKKRWST)[39.99544]HRGTITERGCGCPTVKKGIELHCCTTDQCNL.
	Table S3		7	3FTX	C1IC47	3FTx W-III	W. aegyptia	6939.05		16376	0.254741	7.71554			0.0223751	0.697803		8	0	8		0.0872254	0.605262	0.0910007		FVCHNQQSSQPPTT(TNCSGGENKCYKKRWST)[82.99544]HRGTITERGCGCPTVKKGIELHCCTTDQCNL
	Table S4		8	KUN	C1IC53	KUN Inh4	W. aegyptia	7070.93		6637	0.103243	2.50057	0.463371		0.393023	12.2571		6	1	7		1.75101	12.3813	1.86151		(ISGLGGPKYCHLPADPGPCSNYRPAYYYNPASRKCEEFMYGGCKGNKNNFKTRHECHRVCVR)[ +42.26]
	Table S5		9	KUN	C1IC53	KUN Inh4	W. aegyptia	6661.97		234269	3.64423	88.2635			0.0204186	0.636788		6	1	7		0.0909697	0.606038	0.0911173		GGPKYCHLPADPGPCSNYRPAYYYNPASRKCEEFMYGGCKGNKNNFKTRHECHRVCVR
	Table S6		10	KUN	C1IC53	KUN Inh4	W. aegyptia	7198.15		20401	0.317352	7.68631			0.0139445	0.434884		6	1	7		0.0621263	0.447194	0.0672353		(ISGLGGPKYCHLPADPGPCSNYRPAYYYNPASRKCEEFMYGGCKGNKNNFKTRHECHRVCVR)[ +150.1314] + Met-ox]
	Table S7		11	3FTX	C1IC47	3FTx W-III	W. aegyptia	6863.88		4113	0.0639807	1.54962			0.0251514	0.784388		8	0	8		0.0980484	0.672992	0.101184		FVCHNQQSSQP(PTTTNCSGGENKCYKKRWSTHRGTITERGCGCPTVKKGIELHCCTTDQC)[1.98903]NL.
	Table S8		12	3FTX	P80958	cobrotoxin b	N. atra	6775.04		90687	1.4107	70.9679	1.34661		0.958066	29.8789		8	0	8		3.73486	25.3038	3.80441		(LE)[-43.94022]CHNQQSSQTPTTKTCSGETNCYKKWWSDHRGTIIERGCGCPKVKPGVNLNCCTTDRCNN
			13	PLA2	C1IC46	svPLA2 PL-I	W. aegyptia	13533		37099	0.577102	29.0321			0.391934	12.2231		14	1	15		0.814873	11.0277	1.658		HLGQFNNMIKCTI(PGSTPWWDFSDYGCYCGYGGSGTPVDQLDRCCQTHDNCYTEAQKFSGCSPYTRKYSYECSEGTLTCKSDNDECAAFVCNCDRSAAICFARAPYNSNNVD)[176.08138]IDLEAHCQ [Met-ox].
			14	(3FTX)				7640.34		26805	0.416971	32.1522	0.433364		0.138255	4.3117		8	0	8		0.538962	4.11786	0.619116
			15	KUN	C1IC53	KUN Inh4	W. aegyptia	7181.15		56564	0.879894	67.8478			0.291745	9.09856		6	1	7		1.29979	9.33402	1.40336		(ISGLGGPKYCHLPADPGPCSNYRPAYYYNPASRKCEEFMYGGCKGNKNNFKTRHECHRVCVR)[ +150.1314]]
			16	3FTX	O93422	Kappa cobrotoxin	N. atra	7373.15		2134	0.0331959	62.987	0.132976		0.0818831	2.55366		10	0	10		0.255366	1.88285	0.283086		TCLICPEK(Y)[33.93380]CNKVHTCLNGEKICFKKYDQRKLLGKRYIRGCADTCPVRKPREIVECCSTDKCNH
			17	(KUN)				6426.96		1254	0.0195069	37.013			0.0481169	1.5006		6	0	6		0.250101	1.60739	0.24167		(KUN)
			18	3FTX	O93422	Kappa cobrotoxin	N. atra	7374.15		22109	0.343922	3.33875	0.938134		0.0313842	0.97877		10	0	10		0.097877	0.721759	0.108516		TCLICPEK(Y)[34.93380]CNKVHTCLNGEKICFKKYDQRKLLGKRYIRGCADTCPVRKPREIVECCSTDKCNH
			19	3FTX	P82463	MTLP-2	N. kaouthia	7361.12		22696	0.353053	3.42739			0.0322175	1.00476		8	2	10		0.100476	0.739614	0.1112		LTCVKYYTIFGVTPVDC(PDGQNLCFKRWHMMAPGRYDITRGCAATCPKAENHDSIK)[83.02069]CCSTDKCNL
			20	3FTX	O93422	Kappa cobrotoxin	N. atra	7329.47		533773	8.30323	80.6067			0.757703	23.6302		10	0	10		2.36302	17.3197	2.60401		LTCLICPEKYCNKVHTCLNGEKICFKKYDQRKL(LGKRYIRGCADTCPVRKPREIVECCSTDKCNH)[-81.17235]
			21	3FTX	P29180	Weak NTX 6	N. naja	7344.96		50639	0.787727	7.64715			0.0718833	2.2418		10	0	10		0.22418	1.64659	0.247564		LTCLICPEKYCNKVHTCLNGE(KICFKRYSERKLLGKRYIRGCAD)[-161.17631]TCPVRKPREIVQCCSTDKCNH
			22	3FTX	P82463	MTLP-2	N. kaouthia	7382.89		32977	0.512981	4.97996			0.0468116	1.4599		8	2	10		0.14599	1.07783	0.16205		LTCVKYYTIFGVTPVDC(PDGQNLCFKRWHMMAPGRYDITRGCAATCPKAENHDSIK)[104.02069]CCSTDKCNL
			23	KUN	C1IC50	Kln-I	W. aegyptia	6342.9		290538	4.51953	15.946	1.24997		0.199324	6.21626		6	0	6		1.03604	6.57153	0.988024		RPGLCELPAETGPCKARIRAFYYNPHSHKCLEFTYGGCKGNANNFKTIDECNRTCVG
			24	KUN	C1IC50	Kln-I	W. aegyptia	6470.11		279225	4.34355	15.325			0.191563	5.97421		6	0	6		0.995702	6.4423	0.968595		RPGLCELPAETGPCKARIRAFYYNPHSHKCLEFTYGGCKGNANNFKTIDECNRTCVG [+27.21]
			25	3FTX	O93422	Kappa cobrotoxin	N. atra	7401.08		600190	9.33639	32.941			0.411762	12.8415		10	0	10		1.28415	9.50409	1.42893		LTCLICPEKYCNKVHTCLNGEKICFKKYDQRKL(LGKRYIRGCADTCPVRKPREIVECCSTDKCNH)[-153.17235]
			26	3FTX	O93422	Kappa cobrotoxin	N. atra	7448.25		37280	0.579918	2.04608			0.0255761	0.797631		10	0	10		0.0797631	0.594095	0.0893218		LTCLICPEKYCNKVHTCLNGEKICFKKYDQRKL(LGKRYIRGCADTCPVRKPREIVECCSTDKCNH)[-106.17215]
			27	3FTX	O93422	Kappa cobrotoxin	N. atra	7394.47		614784	9.56341	33.7419			0.421774	13.1537		10	0	10		1.31537	9.72649	1.46237		LTCLNCPEVYCRKFHTCRNGENICFKRFDQRKLLGKRYTRGCAATCPEAKPRETVECCSTDKCN
			28	3FTX	O93422	Kappa cobrotoxin	N. atra	7472.43		8198	0.127526	25.1874	0.183203		0.0453373	1.41392		10	0	10		0.141392	1.05654	0.15885		TCLICPEK(Y)[31.93380]CNKVHTCLNGEKICFKKYDQRKLLGKRYIRGCADTCPVRKPREIVECCSTDKCNH.
			29	KUN	C1IC53	KUN Inh4	W. aegyptia	6617.88		24350	0.378782	74.8126			0.134663	4.19968		6	1	7		0.599954	3.97042	0.59695		GGPKYCHLPADPG(PCSNYRPAYY)[-10.92377]YNPASRKCEEFMYGGCKGNKNNFKTRHECHRVCVR
			30	KUN	C1IC50	Kln-I	W. aegyptia	6389.79		75399	1.17289	11.2371	1.08154		0.12136	3.78482		6	0	6		0.630803	4.0307	0.606013		RPGLCELPAETGPCKARIRAFYYNPHSHKCLEFTYGGCKGNANNFKTIDECNRTCVG [+51.9]
			31	KUN	C1IC50	Kln-I	W. aegyptia	6441.81		551246	8.57503	82.1547			0.887271	27.671		6	0	6		4.61184	29.7086	4.46666		RPGLCELPAETGPCKARIRAFYYNPHSHKCLEFTYGGCKGNANNFKTIDECNRTCVG [+103.93]
			32	KUN	C1IC50	Kln-I	W. aegyptia	6427.78		44340	0.689741	6.6082			0.0713685	2.22574		6	0	6		0.370957	2.38443	0.358498		RPGLCELPAETGPCKARIRAFYYNPHSHKCLEFTYGGCKGNANNFKTIDECNRTCVG [+89.93]
			33	KUN	C1IC53	KUN Inh4	W. aegyptia	6601.86		203158	3.16027	93.8895	0.373612		0.347391	10.834		6	1	7		1.54771	10.2178	1.53623		GGPKYCHLPADPG(PCSNYRPAYY)[-27.01377]YNPASRKCEEFMYGGCKGNKNNFKTRHECHRVCVR
			34	3FTX	P80958	cobrotoxin b	N. atra	6653.84		13222	0.205678	6.11055			0.022609	0.7051		8	0	8		0.0881375	0.586452	0.0881726		TLECHNQQSSQAPTTKTCSGETNCYKKWWSDHRGTIIERGCGCPKVKPGVNLNCCTTDRCN [-24.03]
			35	3FTX	P82463	MTLP-2	N. kaouthia	7632.29		1254	0.0195069	1.40828	0.539459		0.00760469	0.237165		10	2	12		0.0197637	0.150843	0.0226791		LTCVKYYTIFGVTPVDC(PDGQNLCFKRWHMMAPGRYDITRGCAATCPKAENHDSIK)[83.02069]CCSTDKCNL
			36	3FTX	P29180	Weak NTX 6	N. naja	7346.29		85037	1.32281	95.4989			0.515694	16.0828		10	0	10		1.60828	11.8149	1.77636		LTCLICPEKYCNKVHTCLNGE(KICFKRYSERKLLGKRYIRGCAD)[-161.17631]TCPVRKPREIVQCCSTDKCNH
			37	3FTX	P82463	MTLP-2	N. kaouthia	7382.89		2754	0.0428405	3.09282			0.0167012	0.520855		8	0	8		0.0651069	0.480677	0.0722694		TRLCLSDYSIFSETI(EICPDGHNFCFKKFPKGI)[-99.02225]TRLPWVIRGCAATCPKAEAQVYVDCCARDKCNR
			38	PLA2	ABX82863	PLA2-I	W. aegyptia	13333.5		117094	1.82148	91.6078	6.56687		6.01863	187.701		14	1	15		12.5134	166.848	25.0855		HLGQFNNMIKCTIPGSTPWWDFSDYGCYCGYGGSGTPVDQLDRCCQTHDNCYTEAQKFSGCSPYTRKYSYECSEGTLTCKSDNDECAAFVCNCDRSAAICFARAPYNSNNVDIDLEAHCQ
			39	PLA2	ABX82863	PLA2-I	W. aegyptia	13316.5		6440	0.100179	5.0383			0.331016	10.3233		14	1	15		0.688219	9.16463	1.3779		HLGQFNNMIKCTIPGSTPWWDFSDYGCYCGYGGSGTPVDQLDRCCQTHDNCYTEAQKFSGCSPYTRKYSYECSEGTLTCKSDNDECAAFVCNCDRSAAICFARAPYNSNNVDIDLEAHCQ [-16]
				CRISP				26681.9		4287	0.0666874	3.35391			0.220352	6.87204		16	4	20		0.343602	9.16796	1.3784
			40	PLA2	ABX82863	PLA2-I	W. aegyptia	13323.8		2586	0.0402271	3.06271	3.05173		0.0934127	2.91323		14	1	15		0.194215	2.58769	0.389057		HLGQFNNMIKCTIPGSTPWWDFSDYGCYCGYG(GSGTPVDQLDRCCQTHDNCYTEAQKFSGCSPYTRKYSYECSEGTLTCKSDNDECAAFVCNCDRSAAICFARAPYNSNNVDIDLEAHCQ)[24.05230]
			41	PLA2	ABX82863	PLA2-I	W. aegyptia	13389.5		69593	1.08257	82.422			2.51387	78.3992		14	1	15		5.22661	69.9818	10.5217		HLGQFNNMIKCTIPGSTPWWDFSDYGCYCGYGGSGTPVDQLDRCCQTHDNCYTEAQKFSGCSPYTRKYSYECSEGTLTCKSDNDECAAFVCNCDRSAAICFARAPYNSNNVDIDLEAHCQ [+55]
			42	PLA2	ABX82862	PLA2-II	W. aegyptia	13353.6		10451	0.162573	12.3776			0.377516	11.7735		14	1	15		0.784897	10.4812	1.57585		HLGQFNNMIKCTIPGSTPWW(D)[+28.07072]FSDYGCYCGYGGSGTPVDQLDRCCQTHDNCYTEAQKFSGCSPYTRKYSYECSEGTLTCKSDNDECAAFVCNCDRSAAICFARAPYNSNNVDIDLEAHCQ [+12]
				CRISP				26681.9		1805	0.0280781	2.13774			0.065201	2.0334		16	4	20		0.10167	2.71275	0.407861
			43	PIII-SVMP		PIII-SVMP		56000		1605	0.0249669	90	1.70506		1.539	47.9963		36	2	38		1.26306	70.7313	10.6344
				svNGF	AEH59581	venom NGF	W. aegyptia	12704.9				6.27			0.107217	3.34374		6	2	8		0.417967	3.03667	0.456561		VHNLGEYSVCDHISAWVTKTTATDIKGNTVIVMEDVNLNNEVYKQYFFETKCRNPNPEPSGCKGIDSSHWNSYCTETDTFVKALTMEGNQASWRFIRINT(SCVCVI)[-15.98624]SRKTEN
			44	(3FTX)				7265.32		11746	0.182718	49.2825	0.207391		0.103493	3.22761		8	0	8		0.403451	2.9312	0.440704		(3FTX)
			45	KUN	C1IC53	KUN Inh4	W. aegyptia	7194.28		12088	0.188038	50.7175			0.106507	3.32159		6	1	7		0.474512	3.41378	0.513259		(ISGLGGPKYCHLPADPGPCSNYRPAYYYNPASRKCEEFMYGGCKGNKNNFKTRHECHRVCVR)[ +146.1314] + Met-ox]
			46	svNGF	AEH59581	venom NGF	W. aegyptia	12852		10858	0.168904	0.1	1.70506		0.00171	0.0533292		6	2	8		0.00666615	0.0856735	0.0128809		VHNLGEYSVCDHISAWVTKTTATDIKGNTVIVMEDVNLNNEVYKQYFFETKCRNPNPEPSGCKGIDSSHWNSYCTETDTFVKALTMEGNQASWRFIRINT(SCVCVI)[-15.98624]SRKTENF
				PIII-SVMP		PIII-SVMP		56000		67114	1.04401	16			0.2736	8.53267		36	2	38		0.224544	12.5745	1.89056
			47	svNGF	AEH59581	venom NGF	W. aegyptia	13329.2				0.01			0.000171	0.00533292		6	2	8		0.000666615	0.0373304	0.0056126		EDHPVHNLGEYSVCDHISAWVTKTTATDIKGNTVIVMEDVNLNNEVYKQYFFETKCRNPNPEPSGCKGIDSSHWNSYCTETDTFVKALTMEGNQASWRFIRINTACVCVISRKTENF
				PIII-SVMP		PIII-SVMP		56000		4235	0.0658785	5.6	0.421732		0.09576	2.98643		36	2	38		0.0785904	0.433291	0.0651449
			48					5513.28				0.6			0.01026	0.319975		6	2	8		0.0399969	1.00
			49	CRISP	Q7ZT98	ophanin	O. hannah	24890.4		2805	0.0436338	100	0.31485		0.31	9.66786		16	4	20		0.483393	12.0318	1.80898		CRISP [O. hannah Q7ZT98/N. atra Q7T1K6/N. annulifera P0DL15] (from bottom-up MS/MS analysis)
			50	CRISP	Q7ZT98	ophanin	O. hannah	25011.4		34269	0.533079	96.4699	1.06723		1.03223	32.1917		16	4	20		1.60959	40.2581	6.05277		CRISP [O. hannah Q7ZT98/N. atra Q7T1K6/N. annulifera P0DL15] (from bottom-up MS/MS analysis)
			51	CRISP	Q7ZT98	ophanin	O. hannah	24993.5		1254	0.0195069	3.53011			0.0377721	1.17799		16	4	20		0.0588993	1.4721	0.221329		CRISP [O. hannah Q7ZT98/N. atra Q7T1K6/N. annulifera P0DL15] (from bottom-up MS/MS analysis)
										6428499	100		24.0502			693.287							665.118	100
													0.935
																											mg toxin/ 665,12 mg V	mg/100 mg venom	venomics [%]		Mean ± SD		ESI-QToF (% cps)
																										3FTX	150.34	22.6035	24,4		23,50 ± 0,9		65.8
																										KUN	92.12	13.8502	13,1		13,47 ± 0,37		28.5
																										PLA2	270.09	40.6078	40,1		40,35 ± 0,26		3.9
																										CRISP	65.64	9.86892	8,1		8,98 ± 0,87		0.6
																										PIII-SVMP	83.73	12.5887	6.6		9,59 ± 2,98		1.1
																										svNGF	3.17	0.476607	0.2		0,34 ± 0,14		0.2
																											665.12	99.9958	92.5
																										LAO			6.7
																										PDE			0.7
																										5'NT			0.1
																													7.5
																												TOTAL	100

## Sheet: W. aegyptia (Riyadh) ICP-MS
			Table S7. Quantification by QQQ ICP-MS of the venom proteome of W. aegyptia (Riyadh, Saudi Arabia)
			Sample decomplexation and ESI-QToF mass profiling							Relative quantification								Absolute quantification
										ESI-QToF					mg S/mg venom			Sulfur atoms/molecule				Proteome composition calculations
			HPLC fraction	Protein family	Closest homologue			MW (Da)		Intensity (cps)	% of total cps	% of peak intensity	HPLC peak		individual ID	mmoles S/g weighted venom		[nº CYS]	[nº MET]	nº S		mmoles Toxin/ g weighted V	mgToxin/gV	mg/100 mg toxins		Protein matching by transcriptome-assisted top-down MS/MS analysis
			1	3FTX	C1IC47	3FTx W-III	W. aegyptia	6848.03		2512701	41.4607	80.2801	5.89931		4.73653	147.716		8	0	8		18.4645	126.446	16.397		FVCHNQQSSQPPTTTNCSGGENKCYKKQWSDHRGSITERGCGCPTVKKGIKLHCCTTEKCNN
			2	3TTX	C1IC47	3FTx W-III	W. aegyptia	6830.02		116866	1.92834	3.73384			0.220296	6.8703		6	1	7		0.981472	6.70347	0.869283		FVCHNQQSSQP(PTTTNCSGGENKCYKKRWST)[23.93812]HRGTITERGCGCPTVKKGIELHCCTTDQCNL
	INDEX		3	3FTX	C1IC47	3FTx W-III	W. aegyptia	6864.02		276271	4.5586	8.82678			0.52078	16.2414		8	0	8		2.03017	13.9351	1.80706		FVCHNQQSSQP(PTTTNCSGGENKCYKKRWSTHRGTITERGCGCPTVKKGIELHCCTTDQC)[1.98903]NL.
	Table S1		4	3FTX	C1IC47	3FTx W-III	W. aegyptia	6880.02		66756	1.1015	2.13284			0.125837	3.92444		8	0	8		0.490555	3.37503	0.437662		FVCHNQQSSQPPT(TTNCSGGENKCYKKRWSTHRGTITERGCGCPTVKKGIELHCCTTDQCNL)[18.97861].
	Table S2		5	KUN	C1IC51	KIn-III	W. aegyptia	6919.99		35391	0.583967	1.13073			0.0667132	2.08056		6	0	6		0.34676	2.39958	0.311169		VSGRPRLCELPAESGLCNAYIPSFYYNPHSHKCQKFMYGGCGGNANNFKTIVECHRTCVG
	Table S3		6	KUN	C1IC51	KIn-III	W. aegyptia	6710.94		15084	0.248893	0.48193			0.0284338	0.886756		6	0	6		0.147793	0.991828	0.128617		PVSGRPRLCELPAESGLCNAYIPSFYYNPHSHKCQKFMYGGCGGNANNFKTIVECHRTCVG
	Table S4		7	3FTX	C1IC47	3FTx W-III	W. aegyptia	6902.99		80887	1.33467	2.58432			0.152475	4.75518		8	0	8		0.594397	4.10311	0.532077		T.FVCHNQQSSQPPTT(TNCSGGENKCYKKRWST)[74.99544]HRGTITERGCGCPTVKKGIELHCCTTDQCNL.
	Table S5		9	3FTX	C1IC47	3FTx W-III	W. aegyptia	6935.02		11245	0.185548	0.359275			0.0211972	0.66107		8	0	8		0.0826337	0.573066	0.0743132		T.FVCHNQQSSQPPTT(TNCSGGENKCYKKRWST)[43.99544]HRGTITERGCGCPTVKKGIELHCCTTDQCNL.
	Table S6		10	KUN	C1IC53	KUN Inh4	W. aegyptia	7021.06		7234	0.119364	0.231124			0.0136363	0.425272		6	1	7		0.0607531	0.426551	0.0553136		(ISGLGGPKYCHLPADPGPCSNYRPAYYYNPASRKCEEFMYGGCKGNKNNFKTRHECHRVCVR)[ - 11.26]
	Table S7		11	KUN	C1IC53	KUN Inh4	W. aegyptia	6677.96		7483	0.123473	0.23908			0.0141057	0.43991		6	1	7		0.0628442	0.419671	0.0544215		GGPKYCHLPADPGPCSNYRPAYYYNPASRKCEEFMYGGCKGNKNNFKTRHECHRVCVR [Met-ox]
	Table S8		12	KUN	C1IC53	KUN Inh4	W. aegyptia	6660.9		85461	1.41014	67.2106	0.54623		0.369658	11.5284		6	1	7		1.64692	10.9699	1.42254		GGPKYCHLPADPGPCSNYRPAYYYNPASRKCEEFMYGGCKGNKNNFKTRHECHRVCVR
			13	3FTX	ABX82864	3FTx W-III	W. aegyptia	6857		41693	0.687953	32.7894			0.180342	5.62425		8	0	8		0.703031	4.82068	0.625129		FVCHNQQSSQP(PTTTNCSGGENKCYKKRWSTHRGTITERGCGCPTVKKGIELHCCTTDQC)[1.98903]NL.
			14	KUN	ABX82868	KIn-III	W. aegyptia	6812.01		6296	0.103887	100	0.825975		0.83	25.8849		6	1	7		3.69785	25.1897	3.26652		LKCNQLIPPFWKTCPKGKNLCYKMTMRAAPMVPVKRGCIDVCPKSSLLIKYMCCNTDKCN
			15	3FTX	ABY61977	siamenotoxin I	N. siamensis	6828.99		2085	0.0344034	100	5.89931		5.9	184.001		8	0	8		23.0002	157.068	20.368		LECHDQQSSQTPTTTGCSGGETNCYKKRWRDHRGYRTERGCGCPSV(KN)[-114.95783]GIEINCCTTDRCNN
			16	3FTX	AAD09179	cobrotoxin IV	N. atra	6821.99		27100	0.447162	100	2.22536		2.23	69.5462		8	1	9		7.72736	52.716	6.83602		MECHNQQSSQAPTTKTCSGETNCYKKWWSDHRGTIIERGCGCPKVKPGVNLNCCT(TDR)[7.99825]CNN
			17	3FTX	P82463	MTLP-2	N. kaouthia	7329.12		194189	3.20421	66.755	1.56954		1.04805	32.6853		8	2	10		3.26853	23.9555	3.10646		LTCVKYYTIFGVTPVDCPDGQNL(CFKRWHMMAPGRYDITRGCAATCPKAENHD)[49.06075]SIECCSTDKCNL
			18	3FTX	P29180	Weak NTX 6	N. naja	7345.12		69231	1.14234	23.7991			0.373645	11.6527		10	0	10		1.16527	8.55908	1.10991		LTCLICPEKYCNKVHTCLNGE(KICFKRYSERKLLGKRYIRGCAD)[-161.17631]TCPVRKPREIVQCCSTDKCNH
			19	3FTX	P82463	MTLP-2	N. kaouthia	7361.12		27478	0.453399	9.44592			0.148301	4.62501		8	2	10		0.462501	3.40453	0.441487		LTCVKYYTIFGVTPVDC(PDGQNLCFKRWHMMAPGRYDITRGCAATCPKAENHDSIK)[83.02069]CCSTDKCNL
			20	KUN	C1IC50	Kln-I	W. aegyptia	6342.91		55148	0.909967	68.4083	0.68114		0.465176	14.5073		6	0	6		2.41788	15.3364	1.98877		RPGLCELPAETGPCKARIRAFYYNPHSHKCLEFTYGGCKGNANNFKTIDECNRTCVG
			21	KUN	C1IC50	Kln-I	W. aegyptia	6367.67		10730	0.17705	13.31			0.0905081	2.82264		6	0	6		0.470441	2.99561	0.38846		RPGLCELPAETGPCKARIRAFYYNPHSHKCLEFTYGGCKGNANNFKTIDECNRTCVG [+25]
			22	KUN	C1IC50	Kln-I	W. aegyptia	6339.76		11542	0.190448	14.3173			0.0973573	3.03625		6	0	6		0.506042	3.20818	0.416026		RPGLCELPAETGPCKARIRAFYYNPHSHKCLEFTYGGCKGNANNFKTIDECNRTCVG
			23	KUN	C1IC50	Kln-I	W. aegyptia	6470.96		3196	0.0527354	3.96447			0.0269584	0.840743		6	0	6		0.140124	0.906736	0.117582		RPGLCELPAETGPCKARIRAFYYNPHSHKCLEFTYGGCKGNANNFKTIDECNRTCVG [+31]
			24	KUN	C1IC52	Kln-II	W. aegyptia	6389.82		1049200	17.3123	90.183	1.83091		1.65035	51.4689		6	0	6		8.57814	54.8128	7.10793		(RPRFCELPAETGLCKARIRSFHYNRAAQQCLEFIYGGCGGNANR)[-66.20325]FKTIDECHRTCVG
			25	KUN	C1IC52	Kln-II	W. aegyptia	6405.81		91437	1.50875	7.85938			0.143827	4.48547		6	0	6		0.747579	4.78885	0.621001		(RPRFCELPAETGLCKARIRSFHYNRAAQQCLEFIYGGCGGNANR)[-82.20325]FKTIDECHRTCVG
			26	KUN	C1IC50	Kln-I	W. aegyptia	6188.62		6391	0.105454	0.549332			0.0100528	0.313513		6	0	6		0.0522521	0.323369	0.0419333		PGLCELPAETGPCKARIRAFYYNPHSHKCLEFTYGGCKGNANNFKTIDECNRTCVG
			27	KUN	C1IC50	Kln-I	W. aegyptia	6136.66		8719	0.143867	0.749434			0.0137146	0.427714		6	0	6		0.0712856	0.437456	0.0567277		PGLCELPAETGPCKARIRAFYYNPHSHKCLEFTYGGCKGNANNFKTIDECNRTCVG [-52]
			28	(KUN)				6538.82		7665	0.126476	0.658838			0.0120567	0.376009		6	0	6		0.0626682	0.409776	0.0531384		(KUN)
			29	3FTX	P82463	MTLP-2	N. kaouthia	7362.3		14838	0.244834	0.279411	0.436205		0.00122941	0.0383412		8	2	10		0.00383412	0.0282279	0.0036605		LTCVKYYTIFGVTPVDC(PDGQNLCFKRWHMMAPGRYDITRGCAATCPKAENHDSIK)[83.02069]CCSTDKCNL
			30	3FTX	P82463	MTLP-2	N. kaouthia	7347.27		184715	3.04788	91.7267			0.403597	12.5869		8	2	10		1.25869	9.2479	1.19923		LTCVKYYTIFGVTPVDCPD(GQN)[67.07381]LCFKRWHMMAPGRYDITRGCAATCPKAENHDSIECCSTDKCNL
			31	3FTX	Q9W717	NTL-2	N. atra	7379.45		25500	0.420761	7.99391			0.0351732	1.09693		8	0	8		0.137117	1.01185	0.131213		TRLCLSDYSIFSETIEICPDGHNFCFKKFPKGIT(RLPWVIRGCAATCPKAE)[-289.14653]ARVYVDCCARDKC
			32	3FTX	Q9W717	NTL-2	N. atra	7238.74		46112	0.760869	100	0.233143		0.23	7.17293		8	0	8		0.896616	6.49037	0.841649		YTRLCLSDYSIFSETIEICPDGHNFCFKKFPKGIT(RLPWVIRGCAATCPKAE)[-289.14653]ARVYVDCCARDKCNR
			33	PLA2	C1IC46	svPLA2 PL-I	W. aegyptia	13353.5		48183	0.795041	5.35897	3.07739		0.165056	5.14755		14	1	15		0.34317	4.58253	0.594247		HLGQFNNMIKCTIPGSTPWWDFSDYGCYCGYG(GSGTPVDQLDRCCQTHDNCYTEAQKFSGCSPYTRKYSYECSEGTLTCKSDNDECAAFVCNCDRSAAICFARAPYNSNNVDIDLEAHCQ)[24.05230]
			34	PLA2	ABX82863	PLA2-I	W. aegyptia	13335.5		735924	12.1431	81.8504			2.52099	78.6213		14	1	15		5.24142	69.8971	9.06401		HLGQFNNMIKCTIPGSTPWWDFSDYGCYCGYGGSGTPVDQLDRCCQTHDNCYTEAQKFSGCSPYTRKYSYECSEGTLTCKSDNDECAAFVCNCDRSAAICFARAPYNSNNVDIDLEAHCQ
			35	PLA2	C1IC46	svPLA2 PL-I	W. aegyptia	13369.5		40846	0.673977	4.54294			0.139923	4.36372		14	1	15		0.290915	3.88938	0.504362		HLGQFNNMIKCTIPGSTPWWDFSDYGCYCGYGGSGTPVDQLDRCCQTHDNCYTEAQKFSGCSPYTRKYSYECSEGTLTCKSDNDECAAFVCNCDRSAAICFARAPYNSNNVDIDLEAHCQ [+16]
			36	PLA2	ABX82863	PLA2-I	W. aegyptia	13390.5		54103	0.892724	6.0174			0.185336	5.78001		14	1	15		0.385334	5.1598	0.669105		HLGQFNNMIKCTIPGSTPWWDFSDYGCYCGYGGSGTPVDQLDRCCQTHDNCYTEAQKFSGCSPYTRKYSYECSEGTLTCKSDNDECAAFVCNCDRSAAICFARAPYNSNNVDIDLEAHCQ [+55]
			37	PLA2	ABX82862	PLA2-II	W. aegyptia	13318.5		20053	0.330884	2.23032			0.0686938	2.14233		14	1	15		0.142822	1.90218	0.246668		HLGQFNNMIKCTIPGSTPWWDFSDYGCYCGYGGSGTPVDQLDRCCQTHDNCYTEAQKFSGCSPYTRKYSYECSEGTLTCKSDNDECAAFVCNCDRSAAICFARAPYNSNNVDIDLEAHCQ [-17]
			38	PLA2	ABX82862	PLA2-II	W. aegyptia	13311.3		3054	0.0503924	100	0.41526		0.42	13.0984		14	1	15		0.873226	11.6238	1.50734		HLGQFNNMIKCTIPGSTPWWDFSDYGCYCGYGGSGTPVDQLDRCCQTHDNCYTEAQKFSGCSPYTRKYSYECSEGTLTCKSDNDECAAFVCNCDRSAAICFARAPYNSNNVDIDLEAHCQ [-25]
			39	CRISP	Q7ZT98	ophanin	O. hannah	24888.4		33932	0.559893	56.9004	3.2993		1.87771	58.5596		16	4	20		2.92798	72.8727	9.44987		CRISP [O. hannah Q7ZT98/N. atra Q7T1K6/N. annulifera P0DL15] (from bottom-up MS/MS analysis)
			40	CRISP	Q7ZT98	ophanin	O. hannah	24777.4		14289	0.235775	23.9612			0.790718	24.6599		16	4	20		1.23299	30.5503	3.96166		CRISP [O. hannah Q7ZT98/N. atra Q7T1K6/N. annulifera P0DL15] (from bottom-up MS/MS analysis)
			41	CRISP	Q7ZT98	ophanin	O. hannah	24997.4		11413	0.18832	19.1384			0.631568	19.6965		16	4	20		0.984824	24.618	3.19238		CRISP [O. hannah Q7ZT98/N. atra Q7T1K6/N. annulifera P0DL15] (from bottom-up MS/MS analysis)
										6060441	100		26.9391			840.792							771.15	100
													0.956
																											mg/ 771,15 mg V	mg/100 mg V	venomics [%]		Mean ± SD		ESI-QToF (% cps)
																										3FTX	422.45	54.7818	51,4		53,09 ± 1.69		61
																										KUN	123.63	16.0319	9,4		12,72 ± 3,31		23.1
																										PLA2	97.05	12.5851	18,8		15,68 ± 3,09		14.9
																										CRISP	128.04	16.6038	16,4		16,50 ± 0,10		1
																												100.003	96
																										VEGF			0.16
																										PDE			0.06
																										PIII-SVMP			1.3
																										LAO			2.23
																										AcChol			0.2
																										Endo			0.01
																												TOTAL	99.96

## Sheet: W. morgani ICP-MS
			Table S8. Quantification by QQQ ICP-MS of the venom proteome of W. morgani (Çörten village, Turkey)
			Sample decomplexation and ESI-QToF mass profiling							Relative quantification								Absolute quantification
										ESI-QToF					mg S/mg venom			Sulfur atoms/molecule				Proteome composition calculations
			HPLC fraction	Protein family	Closest homologue			MW (Da)		Intensity (cps)	% of total cps	% of peak intensity	HPLC peak		individual ID	mmoles S/g weighted venom		[nº CYS]	[nº MET]	nº S		mmoles Toxin/ g weighted V	mgToxin/gV	mg/100 mg toxins		Protein matching by transcriptome-assisted top-down MS/MS analysis
			1	3FTX	C1IC47	3FTx W-III	W. aegyptia	6830.02		180437	2.2687	6.42957	8.49225		0.545871	17.0239		6	1	7		2.43198	16.6105	20.2475		FVCHNQQSSQP(PTTTNCSGGENKCYKKRWST)[23.93812]HRGTITERGCGCPTVKKGIELHCCTTDQCNL
			2	3FTX	C1IC47	3FTx W-III	W. aegyptia	6848.03		2440629	30.6869	86.9677			7.38356	230.269		8	0	8		28.7836	197.111	240.27		FVCHNQQSSQPPTTTNCSGGENKCYKKQWSDHRGSITERGCGCPTVKKGIKLHCCTTEKCNN
	INDEX		3	3FTX	C1IC47	3FTx W-III	W. aegyptia	6864.02		73366	0.922458	2.61428			0.221952	6.92194		8	0	8		0.865242	5.93904	7.23946		FVCHNQQSSQP(PTTTNCSGGENKCYKKRWSTHRGTITERGCGCPTVKKGIELHCCTTDQC)[1.98903]NL.
	Table S1		4	3FTX	C1IC47	3FTx W-III	W. aegyptia	6880.02		21063	0.264833	0.750545			0.0637213	1.98725		8	0	8		0.248407	1.70904	2.08326		FVCHNQQSSQPPT(TTNCSGGENKCYKKRWSTHRGTITERGCGCPTVKKGIELHCCTTDQCNL)[18.97861].
	Table S2		5	3FTX	C1IC47	3FTx W-III	W. aegyptia	6900.98		46742	0.587705	1.66557			0.141407	4.41002		8	0	8		0.551252	3.80418	4.63714		FVCHNQQSSQPPTT(TNCSGGENKCYKKRWST)[43.99544]HRGTITERGCGCPTVKKGIELHCCTTDQCNL.
	Table S3		6	KUN	C1IC53	KUN Inh4	W. aegyptia	7010.07		44124	0.554787	1.57229			0.133487	4.16301		6	1	7		0.594716	4.169	5.08185		(ISGLGGPKYCHLPADPGPCSNYRPAYYYNPASRKCEEFMYGGCKGNKNNFKTRHECHRVCVR)[ - 22.26]
	Table S4		7	3FTX	P60770	Atratoxin	N. atra	6896.02		317376	3.99049	100	0.605942		0.605942	18.8973		8	0	8		2.36216	16.2895	19.8563		LECHNQQSSQTPTT(TGCSGGETNCYKKRWRDHRGYRTERGCGCPSVKN)[-55.94812]GIEINCCTTDRCNN
	Table S5		8	KUN	C1IC53	KUN Inh4	W. aegyptia	6661.96		102061	1.28325	100	0.305923		0.305923	9.54071		6	1	7		1.36296	9.07998	11.0681		GGPKYCHLPADPGPCSNYRPAYYYNPASRKCEEFMYGGCKGNKNNFKTRHECHRVCVR
	Table S6		9	KUN	C1IC53	KUN Inh4	W. aegyptia	6677.96		42683	0.536669	100	0.605942		0.605942	18.8973		6	1	7		2.69961	18.0279	21.9753		GGPKYCHLPADPGPCSNYRPAYYYNPASRKCEEF(M-ox)YGGCKGNKNNFKTRHECHRVCVR
	Table S7		10	KUN	C1IC53	KUN Inh4	W. aegyptia	7082.09		14632	0.183974	100	0.31		0.31	9.66786		6	1	7		1.38112	9.78124	11.923		(ISGLGGPKYCHLPADPGPCSNYRPAYYYNPASRKCEEFMYGGCKGNKNNFKTRHECHRVCVR)[ + 50.16]
	Table S8		11	PLA2	C1IC46	svPLA2 PL-I	W. aegyptia	13554.1		171677	2.15856	85.7917	1.61831		1.38983	43.344		14	1	15		2.8896	39.1658	47.7416		HLGQFNNMIKCTI(PGSTPWWDFSDYGCYCGYGGSGTPVDQLDRCCQTHDNCYTEAQKFSGCSPYTRKYSYECSEGTLTCKSDNDECAAFVCNCDRSAAICFARAPYNSNNVD)[214.10138]IDLEAHCQ
			12	PLA2	C1IC46	svPLA2 PL-I	W. aegyptia	13516		16489	0.207322	8.24001			0.133488	4.16305		14	1	15		0.277537	3.75118	4.57254		HLGQFNNMIKCTI(PGSTPWWDFSDYGCYCGYGGSGTPVDQLDRCCQTHDNCYTEAQKFSGCSPYTRKYSYECSEGTLTCKSDNDECAAFVCNCDRSAAICFARAPYNSNNVD)[176.08138]IDLEAHCQ.
			13	PLA2	C1IC46	svPLA2 PL-I	W. aegyptia	13608		11943	0.150164	5.96825			0.0966856	3.0153		14	1	15		0.20102	2.73548	3.33444		HLGQFNNMIKCTI(PGSTPWWDFSDYGCYCGYGGSGTPVDQLDRCCQTHDNCYTEAQKFSGCSPYTRKYSYECSEGTLTCKSDNDECAAFVCNCDRSAAICFARAPYNSNNVD)[227.9138]IDLEAHCQ
			14	KUN	C1IC53	KUN Inh4	W. aegyptia	7152.12		2547	0.0320244	5.54503	0.479809		0.0266162	0.830069		6	1	7		0.118581	0.848107	1.03381		(ISGLGGPKYCHLPADPGPCSNYRPAYYYNPASRKCEEFMYGGCKGNKNNFKTRHECHRVCVR)[ +129.1014]
			15	KUN	C1IC53	KUN Inh4	W. aegyptia	7191.15		26321	0.330944	57.303			0.275055	8.57803		6	1	7		1.22543	8.81228	10.7418		(ISGLGGPKYCHLPADPGPCSNYRPAYYYNPASRKCEEFMYGGCKGNKNNFKTRHECHRVCVR)[ +159.1314]
			16	(3FTX)				7650.36		16410	0.206329	35.7259			0.171485	5.34803		8	0	8		0.668504	5.1143	6.23413		(3FTX)
			17	PLA2	C1IC46	svPLA2 PL-I	W. aegyptia	13355		655	0.00823556	1.42599			0.00684475	0.213465		14	1	15		0.014231	0.190055	0.23167		HLGQFNNMIKCTIPGSTPWWDFSDYGCYCGYG(GSGTPVDQLDRCCQTHDNCYTEAQKFSGCSPYTRKYSYECSEGTLTCKSDNDECAAFVCNCDRSAAICFARAPYNSNNVDIDLEAHCQ)[24.05230]
			18	KUN	C1IC53	KUN Inh4	W. aegyptia	6678.08		7267	0.0913707	100	< LOD			0		6	1	7		0	0	0		GGPKYCHLPADPG(PCSNYRPAYY)[+17.9677]YNPASRKCEEFMYGGCKGNKNNFKTRHECHRVCVR
			19	3FTX	P29180	Weak NTX 6	N. naja	7345.12		389076	4.892	78.1062	1.77678		1.39029	43.3585		10	0	10		4.33585	31.8474	38.8207		LTCLICPEKYCNKVHTCLNGE(KICFKRYSERKLLGKRYIRGCAD)[-161.17631]TCPVRKPREIVQCCSTDKCNH
			20	3FTX	P82463	MTLP-2	N. kaouthia	7328.11		79633	1.00126	15.9862			0.284554	8.87428		8	2	10		0.887428	6.50317	7.92711		LTCVKYYTIFGVTPVDCPDGQNL(CFKRWHMMAPGRYDITRGCAATCPKAENHD)[49.06075]SIECCSTDKCNL
			21	3FTX	P82463	MTLP-2	N. kaouthia	7361.14		8552	0.107527	1.7168			0.030559	0.953032		8	2	10		0.0953032	0.701541	0.855151		LTCVKYYTIFGVTPVDC(PDGQNLCFKRWHMMAPGRYDITRGCAATCPKAENHDSIK)[83.02069]CCSTDKCNL
			22	3FTX	O93422	Kappa cobrotoxin	N. atra	7398.05		20876	0.262482	4.19081			0.0745965	2.32642		10	0	10		0.232642	1.72109	2.09795		LTCLICPEKYCNKVHTCLNGEKICFKKYDQRKL(LGKRYIRGCADTCPVRKPREIVECCSTDKCNH)[-158.17235]
			23	3FTX	O93422	Kappa cobrotoxin	N. atra	7395.43		1161939	14.6095	88.5692	2.58612		2.29394	71.5404		10	0	10		7.15404	52.9072	64.4918		LTCLICPEKYCNKVHTCLNGEKICFKKYDQRKL(LGKRYIRGCADTCPVRKPREIVECCSTDKCNH)[-158.17235]
			24	KUN	C1IC50	Kln-I	W. aegyptia	6338.92		86557	1.08831	6.59784			0.170884	5.3293		6	0	6		0.888217	5.63034	6.86316		RPGLCELPAETGPCKARIRAFYYNPHSHKCLEFTYGGCKGNANNFKTIDECNRTCVG
			25	KUN	C1IC53	KUN Inh4	W. aegyptia	6634.75		63403	0.797189	4.83292			0.125173	3.90371		6	1	7		0.557673	3.70003	4.51019		GGPKYCHLPADPG(PCSNYRPAYY)[-27.95775]YNPASRKCEEFMYGGCKGNKNNFKTRHECHRVCVR
			26	KUN	C1IC53	KUN Inh4	W. aegyptia	6617.86		23858	0.299976	18.3053	0.916622		0.168409	5.2521		6	1	7		0.7503	4.96538	6.05261		GGPKYCHLPADPG(PCSNYRPAYY)[-10.92377]YNPASRKCEEFMYGGCKGNKNNFKTRHECHRVCVR
			27	3FTX	P82463	MTLP-2	N. kaouthia	7378.39		21941	0.275872	16.8344			0.154877	4.83009		8	0	8		0.603761	4.45479	5.43021		TRLCLSDYSIFSETI(EICPDGHNFCFKKFPKGI)[-99.02225]TRLPWVIRGCAATCPKAEAQVYVDCCARDKCNR
			28	(3FTX)				7720.84		35518	0.446581	27.2515			0.250714	7.81893		8	0	8		0.977366	7.54609	9.19839		(3FTX)
			29	KUN	C1IC53	KUN Inh4	W. aegyptia	6617.86		49017	0.616309	37.6088			0.346001	10.7906		6	1	7		1.54151	10.2015	12.4353		GGPKYCHLPADPG(PCSNYRPAYY)[-10.92377]YNPASRKCEEFMYGGCKGNKNNFKTRHECHRVCVR
			30	KUN	C1IC50	Kln-I	W. aegyptia	6389.82		99292	1.24844	93.6284	0.847631		0.795842	24.8196		6	0	6		4.13661	26.4322	32.2198		RPGLCELPAETGPCKARIRAFYYNPHSHKCLEFTYGGCKGNANNFKTIDECNRTCVG [+51.9]
			31	KUN	C1IC50	Kln-I	W. aegyptia	6442.73		6757	0.0849583	6.37158			0.0541585	1.68902		6	0	6		0.281503	1.81365	2.21077		RPGLCELPAETGPCKARIRAFYYNPHSHKCLEFTYGGCKGNANNFKTIDECNRTCVG [+103.93]
			32	KUN	C1IC53	KUN Inh4	W. aegyptia	6601.87		280403	3.52561	95.3758	0.309792		0.295665	9.2208		6	1	7		1.31726	8.69637	10.6005		GGPKYCHLPADPG(PCSNYRPAYY)[-27.01377]YNPASRKCEEFMYGGCKGNKNNFKTRHECHRVCVR
			33	3FTX	P80958	cobrotoxin b	N. atra	6654.78		13595	0.170935	4.62418			0.014335	0.447059		8	0	8		0.0558824	0.371885	0.453314		TLECHNQQSSQAPTTKTCSGETNCYKKWWSDHRGTIIERGCGCPKVKPGVNLNCCTTDRCN [-24.03]
			34	3FTX	P82463	MTLP-2	N. kaouthis	7378.27		117229	1.47396	100	0.111489		0.111489	3.47696		8	0	8		0.43462	3.20675	3.9089		TRLCLSDYSIFSETI(EICPDGHNFCFKKFPKGI)[-99.02225]TRLPWVIRGCAATCPKAEAQVYVDCCARDKCNR
			35	3FTX	P82463	MTLP-2	N. kaouthia	7361.26		192453	2.41978	100	0.254229		0.254229	7.92855		8	2	10		0.792855	5.83641	7.11436		LTCVKYYTIFGVTPVDC(PDGQNLCFKRWHMMAPGRYDITRGCAATCPKAENHDSIK)[83.02069]CCSTDKCNL
			36	3FTX	P29180	Weak NTX 6	N. naja	7345.24		49182	0.618384	100	0.226617		0.226617	7.06741		10	0	10		0.706741	5.19119	6.32785		LTCLICPEKYCNKVHTCLNGE(KICFKRYSERKLLGKRYIRGCAD)[-161.17631]TCPVRKPREIVQCCSTDKCNH
			37	3FTX	P82463	MTLP-2	N. kaouthia	7328.24		15815	0.198848	100	0.254229		0.254229	7.92855		8	2	10		0.792855	5.81023	7.08244		LTCVKYYTIFGVTPVDCPDGQNL(CFKRWHMMAPGRYDITRGCAATCPKAENHD)[49.06075]SIECCSTDKCNL
			38	3FTX	P82463	MTLP-2	N. kaouthia	7378.44		2817	0.0354192	0.303144	2.38293		0.00721482	0.225006		8	0	8		0.0281258	0.207524	0.252964		TRLCLSDYSIFSETI(EICPDGHNFCFKKFPKGI)[-99.02225]TRLPWVIRGCAATCPKAEAQVYVDCCARDKCNR
			39	PLA2	ABX82863	PLA2-I	W. aegyptia	13333.5		882032	11.0901	94.9175			2.25904	70.4518		14	1	15		4.69678	62.6245	76.3368		HLGQFNNMIKCTIPGSTPWWDFSDYGCYCGYGGSGTPVDQLDRCCQTHDNCYTEAQKFSGCSPYTRKYSYECSEGTLTCKSDNDECAAFVCNCDRSAAICFARAPYNSNNVDIDLEAHCQ
			40	PLA2	ABX82863	PLA2-I	W. aegyptia	13316.5		38517	0.484289	4.1449			0.0986487	3.07652		14	1	15		0.205101	2.73122	3.32926		HLGQFNNMIKCTIPGSTPWWDFSDYGCYCGYGGSGTPVDQLDRCCQTHDNCYTEAQKFSGCSPYTRKYSYECSEGTLTCKSDNDECAAFVCNCDRSAAICFARAPYNSNNVDIDLEAHCQ [-16]
			41	PLA2	ABX82863	PLA2-I	W. aegyptia	13387.4		5896	0.0741326	0.634482			0.0151007	0.470939		14	1	15		0.031396	0.420311	0.512342		L.HLGQFNNMIKCTIPGSTPWWDFSDYGCYCGYG(GSGTPVDQLDRCCQTHDNCYTEAQKFSGCSPYTRKYSYECSEGTLTCKSDNDECAAFVCNCDRSAAICFARAPYNSNNVDIDLEAHCQ)[24.05230].
			42	PLA2	ABX82862	PLA2-II	W. aegyptia	13335.5		452732	5.69237	85.2311	3.36414		2.86376	89.3112		14	1	15		5.95408	79.4008	96.7864		HLGQFNNMIKCTIPGSTPWWDFSDYGCYCGYGGSGTPVDQLDRCCQTHDNCYTEAQKFSGCSPYTRKYSYECSEGTLTCKSDNDECAAFVCNCDRSAAICFARAPYNSNNVDIDLEAHCQ
			43	PLA2	ABX82862	PLA2-II	W. aegyptia	13318.5		27794	0.349464	5.23248			0.175811	5.48297		14	1	15		0.365531	4.86833	5.9343		HLGQFNNMIKCTIPGSTPWWDFSDYGCYCGYGGSGTPVDQLDRCCQTHDNCYTEAQKFSGCSPYTRKYSYECSEGTLTCKSDNDECAAFVCNCDRSAAICFARAPYNSNNVDIDLEAHCQ [-17]
			44	PLA2	ABX82863	PLA2-I	W. aegyptia	13389.5		50656	0.636917	9.53647			0.320425	9.99299		14	1	15		0.6662	8.92006	10.8732		HLGQFNNMIKCTIPGSTPWWDFSDYGCYCGYGGSGTPVDQLDRCCQTHDNCYTEAQKFSGCSPYTRKYSYECSEGTLTCKSDNDECAAFVCNCDRSAAICFARAPYNSNNVDIDLEAHCQ [+55]
			45	svNGF	AEH59581	venom NGF	W. aegyptia	13329.2		51776	0.650999	0.02	0.615811		0.000124	0.00386714		6	2	8		0.000483393	0.00644325	0.00785408		EDHPVHNLGEYSVCDHISAWVTKTTATDIKGNTVIVMEDVNLNNEVYKQYFFETKCRNPNPEPSGCKGIDSSHWNSYCTETDTFVKALTMEGNQASWRFIRINTACVCVISRKTENF
			46	PLA2	ABX82862	PLA2-II	W. aegyptia	13313.2		7539	0.0947907	99.08			0.614296	19.1578		14	1	15		1.27719	17.0035	20.7265		HLGQFNNMIKCTIPGSTPWWDFSDYGCYCGYGGSGTPVDQLDRCCQTHDNCYTEAQKFSGCSPYTRKYSYECSEGTLTCKSDNDECAAFVCNCDRSAAICFARAPYNSNNVDIDLEAHCQ [-25]
			47	PLA2	ABX82862	PLA2-II	W. aegyptia	13347.3		34076	0.42845				0	0		14	1	15						HLGQFNNMIKCTIPGSTPWW(D)[+28.07072]FSDYGCYCGYGGSGTPVDQLDRCCQTHDNCYTEAQKFSGCSPYTRKYSYECSEGTLTCKSDNDECAAFVCNCDRSAAICFARAPYNSNNVDIDLEAHCQ
			48	CRISP	Q7ZT98	ophanin	O. hannah	24924.2		5487	0.0689901	65.5399	0.407019		0.268714	8.38028		16	4	20		0.419014	10.4436	12.7303		CRISP [O. hannah Q7ZT98/N. atra Q7T1K6/N. annulifera P0DL15] (from bottom-up MS/MS analysis)
			49	CRISP	Q7ZT98	ophanin	O. hannah	24800.3		2885	0.0362742	34.4601			0.141286	4.40625		16	4	20		0.220313	5.46382	6.66019		CRISP [O. hannah Q7ZT98/N. atra Q7T1K6/N. annulifera P0DL15] (from bottom-up MS/MS analysis)
			50	CRISP	Q7ZT98	ophanin	O. hannah	24905.2		31499	0.396049	100	1.45251		1.45251	45.2989		16	4	20		2.26494	56.4089	68.7602		CRISP [O. hannah Q7ZT98/N. atra Q7T1K6/N. annulifera P0DL15] (from bottom-up MS/MS analysis)
			51	CRISP	Q7ZT98	ophanin	O. hannah	25039.5		7440	0.0935459	10.3792	0.42936		0.0446305	1.39187		16	4	20		0.0695937	1.7426	2.12416		CRISP [O. hannah Q7ZT98/N. atra Q7T1K6/N. annulifera P0DL15] (from bottom-up MS/MS analysis)
			52	CRISP	Q7ZT98	ophanin	O. hannah	24897.4		64242	0.807739	89.6208			0.38537	12.0184		16	4	20		0.600919	14.9613	18.2373		CRISP [O. hannah Q7ZT98/N. atra Q7T1K6/N. annulifera P0DL15] (from bottom-up MS/MS analysis)
			53	CRISP	Q7ZT98	ophanin	O. hannah	25020.5		36410	0.457796	100	0.627766		0.627766	19.5779		16	4	20		0.978896	24.4925	29.8554		CRISP [O. hannah Q7ZT98/N. atra Q7T1K6/N. annulifera P0DL15] (from bottom-up MS/MS analysis)
										7953316	100		28.9812			904.072							820.371
													0.914
																											mg/ 820,37 mg V	mg/100 mg V	venomics [%]		Mean ± SD		ESI-QToF (% cps)
																										3FTX	372.88	45.4526	39.4		42,43 ± 3,02		65.4
																										KUN	112.158	13.6716	7.23		10,44 ± 3,23		10.7
																										PLA2	221.81	27.0378	26.1		26,57 ± 0,47		21.4
																										CRISP	113.5	13.8352	13.5		13,67 ± 0,17		1.9
																										svNGF	0.01	0.00121896	0.01		0,0056 ± 0,0044		0.7
																												99.9984	86.24
																										PIII-SVMP			7.1
																										LAO			6.4
																										Endo			0.01
																										VEGF			0.16
																										5'NT			0.01
																										PDE			0.06
																													13.74
																												TOTAL	99.98
